# Supplementary material
Source: PubMed Central journal article supplement (PMC4707102)
Supplement: NIHMS733225-supplement-2.pdf [file NIHMS733225-supplement-2.pdf]

**Table S1.** Antibody list for CyTOF.

| Marker      | Clone    | Label | Vendor       | Cat#                                        | Used for Fig. 1c-d | Used for Fig. 1e-f |
|-------------|----------|-------|--------------|---------------------------------------------|--------------------|--------------------|
| Gr-1        | RB6-8C5  | 141Pr | DVS sciences | 3141005B                                    |                    | YES                |
| CD11c       | N418     | 142Nd | DVS sciences | 3142003B                                    | YES                | YES                |
| CD69        | H1.2F3   | 143Nd | DVS sciences | 3143004B                                    |                    | YES                |
| CD4         | RM4-5    | 145Nd | DVS sciences | 3145002B                                    | YES                | YES                |
| CD8a        | 53-6.7   | 146Nd | DVS sciences | 3146003B                                    | YES                | YES                |
| CD45        | 30-F11   | 147Sm | DVS sciences | 3147003B                                    | YES                | YES                |
| CD11b       | M1/70    | 148Nd | DVS sciences | 3148003B                                    | YES                | YES                |
| CD19        | 6D5      | 149Sm | DVS sciences | 3149002B                                    | YES                | YES                |
| CD25        | 3C7      | 151Eu | DVS sciences | 3151007B                                    |                    | YES                |
| CD3e        | 145-2C11 | 152Sm | DVS sciences | 3152004B                                    |                    | YES                |
| CD62L       | MEL-14   | 160Gd | DVS sciences | 3160008B                                    |                    | YES                |
| Ter119      | TER119   | 162Dy | DVS sciences | 3162003B                                    |                    | YES                |
| TCR $\beta$ | H57-597  | 169Tm | DVS sciences | 3169002B                                    | YES                | YES                |
| NK1.1       | PK136    | 170Er | DVS sciences | 3170002B                                    | YES                | YES                |
| CD44        | 1M7      | 171Yb | DVS sciences | 3171003B                                    |                    | YES                |
| Ep-CAM      | G8.8     | 174Yb | BioLegend    | 118201<br>( <i>metal-labeled in-house</i> ) |                    | YES                |
| B220        | RA3-6B2  | 176Yb | DVS sciences | 3176002B                                    | YES                | YES                |
