# Supplementary material
Source: PubMed Central journal article supplement (PMC4707102)
Supplement: NIHMS733225-supplement-3.pdf [file NIHMS733225-supplement-3.pdf]

**Supplementary Table S2**

| <b>Animal Number</b> | <b>Group</b>    | <b>Most advanced tumor</b>    | <b>Predominant tumor</b> | <b>Fibrosis</b> | <b>Inflammation</b> |
|----------------------|-----------------|-------------------------------|--------------------------|-----------------|---------------------|
| Mouse#1              | IgG             | Adenocarcinoma                | mPIN                     | 4               | 3                   |
| Mouse#2              | IgG             | Adenocarcinoma                | Adenocarcinoma           | 4               | 4                   |
| Mouse#3              | IgG             | Adenocarcinoma                | Adenocarcinoma           | 4               | 4                   |
| Mouse#4              | IgG             | Adenocarcinoma                | Adenocarcinoma           | 4               | 4                   |
| Mouse#5              | Gr1             | Adenocarcinoma                | mPIN                     | 4               | 4                   |
| Mouse#6              | Gr1             | Adenocarcinoma                | mPIN                     | 3               | 3                   |
| Mouse#7              | Gr1             | Adenocarcinoma                | mPIN                     | 3               | 3                   |
| Mouse#8              | Gr1             | Adenocarcinoma                | mPIN                     | 3               | 3                   |
| Mouse#9              | Vehicle         | Adenocarcinoma                | mPIN                     | 3               | 3                   |
| Mouse#10             | Vehicle         | Adenocarcinoma                | Adenocarcinoma           | 4               | 4                   |
| Mouse#11             | Vehicle         | Adenocarcinoma                | Adenocarcinoma           | 4               | 4                   |
| Mouse#12             | Vehicle         | Adenocarcinoma                | Adenocarcinoma           | 4               | 3                   |
| Mouse#13             | Cxcr2 inhibitor | micro-invasive adenocarcinoma | mPIN                     | 2               | 1                   |
| Mouse#14             | Cxcr2 inhibitor | Adenocarcinoma                | mPIN                     | 3               | 2                   |
| Mouse#15             | Cxcr2 inhibitor | Adenocarcinoma                | mPIN                     | 2               | 3                   |
| Mouse#16             | Cxcr2 inhibitor | mPIN                          | mPIN                     | 2               | 2                   |
