# Supplementary material
Source: PubMed Central journal article supplement (PMC4707102)
Supplement: NIHMS733225-supplement-4.pdf [file NIHMS733225-supplement-4.pdf]

**Supplementary Table S3**

| Symbol        | Probe ID    | Description                                                                          | Fold Change | P-Value  |
|---------------|-------------|--------------------------------------------------------------------------------------|-------------|----------|
| 1500015O10Rik | 1460049_s_a | RIKEN cDNA 1500015O10 gene                                                           | 4.68        | 0.0109   |
| 1500015O10Rik | 1423261_at  | RIKEN cDNA 1500015O10 gene                                                           | 3.48        | 0.0096   |
| 2610528A11Rik | 1435639_at  | RIKEN cDNA 2610528A11 gene                                                           | 3.53        | 0.0498   |
| 2810417H13Rik | 1419153_at  | RIKEN cDNA 2810417H13 gene                                                           | 2.41        | 0.0007   |
| Adams12       | 1439827_at  | A disintegrin-like and metallopeptidase (reprolysin type) with thrombospondin type 1 | 3.47        | 0.0002   |
| Ahr           | 1422631_at  | aryl-hydrocarbon receptor                                                            | 2.05        | 0.004    |
| Aldh1a2       | 1422789_at  | aldehyde dehydrogenase family 1, subfamily A2                                        | 3.49        | 0.004    |
| Aldh1a3       | 1448789_at  | aldehyde dehydrogenase family 1, subfamily A3                                        | 6.06        | 0.0022   |
| Alox12e       | 1426039_a_a | arachidonate lipoxygenase, epidermal                                                 | 3.27        | 0.0355   |
| Ang           | 1438936_s_a | angiogenin, ribonuclease, RNase A family, 5                                          | 2           | 0.0048   |
| Angptl4       | 1417130_s_a | angiopoietin-like 4                                                                  | 2.41        | 0.0199   |
| Anxa8         | 1425789_s_a | annexin A8                                                                           | 3.07        | 0.0054   |
| Ap1s2         | 1447903_x_a | adaptor-related protein complex 1, sigma 2 subunit                                   | 2.08        | 0.028    |
| Aplnr         | 1438651_a_a | apelin receptor                                                                      | 2.45        | 0.0021   |
| Arg1          | 1419549_at  | arginase, liver                                                                      | 3.08        | 0.0232   |
| AU040911      | 1459513_at  |                                                                                      | 2.09        | 0.0001   |
| AV229522      | 1442936_at  |                                                                                      | 2.15        | 0.009    |
| AW543723      | 1441971_at  |                                                                                      | 2.48        | 0.0198   |
| BC018473      | 1427451_a_a | cDNA sequence BC018473                                                               | 2.09        | 0.0091   |
| Bcl2a1a       | 1419004_s_a | B cell leukemia/lymphoma 2 related protein A1a                                       | 2.86        | 0.0021   |
| Bcl2l15       | 1452614_at  | BCL2-like 15                                                                         | 2.12        | 0.0465   |
| BE631223      | 1435872_at  |                                                                                      | 2.56        | 0.0177   |
| Birc5         | 1424278_a_a | baculoviral IAP repeat-containing 5                                                  | 2.71        | 0.0017   |
| BM899333      | 1436462_at  |                                                                                      | 2.14        | 0.0047   |
| Bnc1          | 1424890_at  | basonuclin 1                                                                         | 2.01        | 0.0037   |
| C1qb          | 1437726_x_a | complement component 1, q subcomponent, beta polypeptide                             | 2.01        | 0.0069   |
| Calcb         | 1422639_at  | calcitonin-related polypeptide, beta                                                 | 5.72        | 0.0001   |
| Car12         | 1428485_at  | carbonic anhydrase 12                                                                | 3.81        | 0.004    |
| Casp12        | 1418981_at  | caspase 12                                                                           | 2.05        | 0.0118   |
| Ccdc141       | 1437967_at  | coiled-coil domain containing 141                                                    | 2.01        | 0.0308   |
| Ccl12         | 1419282_at  | chemokine (C-C motif) ligand 12                                                      | 2.23        | 0.0025   |
| Ccl20         | 1422029_at  | chemokine (C-C motif) ligand 20                                                      | 3.1         | 0.0034   |
| Ccnb1         | 1416076_at  | cyclin B1                                                                            | 2.18        | 0.0269   |
| Ccnd1         | 1417420_at  | cyclin D1                                                                            | 2.2         | 0.0015   |
| Ccnd2         | 1430127_a_a | cyclin D2                                                                            | 2.7         | 0.0106   |
| Ccr1          | 1419609_at  | chemokine (C-C motif) receptor 1                                                     | 3.23        | 0.000098 |
| Cd200         | 1448788_at  | CD200 antigen                                                                        | 2           | 0.0011   |
| Cd300lf       | 1427994_at  | CD300 antigen like family member F                                                   | 2.12        | 0.0007   |
| Cd44          | 1452483_a_a | CD44 antigen                                                                         | 4.04        | 0.0003   |
| Cd53          | 1448617_at  | CD53 antigen                                                                         | 2.91        | 0.0011   |
| Cd93          | 1456046_at  | CD93 antigen                                                                         | 2.14        | 0.0116   |
| Cdc20         | 1439377_x_a | cell division cycle 20                                                               | 2.12        | 0.0056   |
| Cdca8         | 1436847_s_a | cell division cycle associated 8                                                     | 2.24        | 0.0111   |
| Cdh11         | 1450757_at  | cadherin 11                                                                          | 3.38        | 0.0165   |
| Cdk1          | 1448314_at  | cyclin-dependent kinase 1                                                            | 2.61        | 0.0056   |
| Cdkn2b        | 1449152_at  | cyclin-dependent kinase inhibitor 2B (p15, inhibits CDK4)                            | 2.22        | 0.0063   |
| Cebpd         | 1423233_at  | CCAAT/enhancer binding protein (C/EBP), delta                                        | 2           | 0.0137   |
| Cenpa         | 1450842_a_a | centromere protein A                                                                 | 2.26        | 0.0005   |
| Cep55         | 1452242_at  | centrosomal protein 55                                                               | 2.81        | 0.0009   |
| Ch11          | 1435190_at  | cell adhesion molecule with homology to L1CAM                                        | 3.04        | 0.0146   |
| Chst11        | 1428902_at  | carbohydrate sulfotransferase 11                                                     | 2.83        | 0.0005   |
| Chsy1         | 1434316_at  | chondroitin sulfate synthase 1                                                       | 2.18        | 0.0192   |
| Clca1         | 1460259_s_a | chloride channel calcium activated 1                                                 | 4.32        | 0.0008   |
| Clca2         | 1419463_at  | chloride channel calcium activated 2                                                 | 6.97        | 0.0004   |
| Cldn10        | 1426147_s_a | claudin 10                                                                           | 2.09        | 0.0186   |
| Clec4n        | 1425951_a_a | C-type lectin domain family 4, member n                                              | 3.64        | 0.0026   |
| Clec7a        | 1420699_at  | C-type lectin domain family 7, member a                                              | 2.33        | 0.0166   |
| Col10a1       | 1422253_at  | collagen, type X, alpha 1                                                            | 3.93        | 0.0339   |

|         |             |                                                                                   |      |        |
|---------|-------------|-----------------------------------------------------------------------------------|------|--------|
| Col11a1 | 1418599_at  | collagen, type XI, alpha 1                                                        | 2.21 | 0.0165 |
| Col12a1 | 1434411_at  | collagen, type XII, alpha 1                                                       | 3.94 | 0.0363 |
| Col15a1 | 1448755_at  | collagen, type XV, alpha 1                                                        | 2.31 | 0.0163 |
| Col18a1 | 1418237_s_a | collagen, type XVIII, alpha 1                                                     | 2.29 | 0.0094 |
| Col1a1  | 1455494_at  | collagen, type I, alpha 1                                                         | 3.07 | 0.0159 |
| Col1a2  | 1423110_at  | collagen, type I, alpha 2                                                         | 3.75 | 0.014  |
| Col3a1  | 1427884_at  | collagen, type III, alpha 1                                                       | 4.87 | 0.0091 |
| Col4a1  | 1452035_at  | collagen, type IV, alpha 1                                                        | 2.45 | 0.0046 |
| Col4a2  | 1424051_at  | collagen, type IV, alpha 2                                                        | 2.33 | 0.0403 |
| Col5a1  | 1416741_at  | collagen, type V, alpha 1                                                         | 3    | 0.0069 |
| Col5a2  | 1450625_at  | collagen, type V, alpha 2                                                         | 4.01 | 0.0034 |
| Col6a3  | 1424131_at  | collagen, type VI, alpha 3                                                        | 2.57 | 0.032  |
| Col8a1  | 1455627_at  | collagen, type VIII, alpha 1                                                      | 2.59 | 0.0054 |
| Coro1a  | 1416246_a_a | coronin, actin binding protein 1A                                                 | 2.22 | 0.0052 |
| Cp      | 1455393_at  | ceruloplasmin                                                                     | 5.49 | 0.0049 |
| Cpxm1   | 1448901_at  | carboxypeptidase X 1 (M14 family)                                                 | 2.92 | 0.033  |
| Crabp1  | 1448326_a_a | cellular retinoic acid binding protein I                                          | 2.72 | 0.0337 |
| Crabp2  | 1451191_at  | cellular retinoic acid binding protein II                                         | 2.93 | 0.0003 |
| Crlf1   | 1418476_at  | cytokine receptor-like factor 1                                                   | 2.49 | 0.0092 |
| Csf2rb  | 1455660_at  | colony stimulating factor 2 receptor, beta, low-affinity (granulocyte-macrophage) | 2.6  | 0.0058 |
| Csta    | 1435760_at  | cystatin A                                                                        | 2.22 | 0.0103 |
| Cthrc1  | 1452968_at  | collagen triple helix repeat containing 1                                         | 3.07 | 0.0032 |
| Ctsk    | 1450652_at  | cathepsin K                                                                       | 2.07 | 0.0144 |
| Cxcl1   | 1419209_at  | chemokine (C-X-C motif) ligand 1                                                  | 5.63 | 0.0001 |
| Cxcl2   | 1449984_at  | chemokine (C-X-C motif) ligand 2                                                  | 7.11 | 0.0003 |
| Cxcl3   | 1438148_at  | chemokine (C-X-C motif) ligand 3                                                  | 3.34 | 0.0218 |
| Cxcl5   | 1419728_at  | chemokine (C-X-C motif) ligand 5                                                  | 12   | 0.0004 |
| Cxcr4   | 1448710_at  | chemokine (C-X-C motif) receptor 4                                                | 2.06 | 0.0038 |
| Cybb    | 1436779_at  | cytochrome b-245, beta polypeptide                                                | 2.2  | 0.0089 |
| Cyp7b1  | 1421074_at  | cytochrome P450, family 7, subfamily b, polypeptide 1                             | 3.12 | 0.0056 |
| Cyr61   | 1416039_x_a | cysteine rich protein 61                                                          | 2.76 | 0.0067 |
| Ddah1   | 1429298_at  | dimethylarginine dimethylaminohydrolase 1                                         | 2.33 | 0.0097 |
| Dmkn    | 1428781_at  | dermokine                                                                         | 2.07 | 0.0337 |
| Dnm3os  | 1452382_at  | dynamamin 3, opposite strand                                                      | 2.31 | 0.0247 |
| Dpysl3  | 1454613_at  | Dihydropyrimidinase-like 3                                                        | 2.09 | 0.004  |
| Dsc3    | 1434534_at  | desmocollin 3                                                                     | 2.18 | 0.0018 |
| DST     | 1421117_at  | Dystonin                                                                          | 2.22 | 0.002  |
| Dusp4   | 1428834_at  | dual specificity phosphatase 4                                                    | 3.07 | 0.0008 |
| Dusp6   | 1415834_at  | dual specificity phosphatase 6                                                    | 3.12 | 0.0002 |
| Efemp2  | 1417018_at  | epidermal growth factor-containing fibulin-like extracellular matrix protein 2    | 2.02 | 0.0244 |
| Egr2    | 1427683_at  | early growth response 2                                                           | 2.17 | 0.0065 |
| Emp1    | 1416529_at  | epithelial membrane protein 1                                                     | 2.17 | 0.0032 |
| Ets1    | 1452163_at  | E26 avian leukemia oncogene 1, 5' domain                                          | 2.48 | 0.0061 |
| Fabp5   | 1416022_at  | fatty acid binding protein 5, epidermal                                           | 2.67 | 0.0043 |
| Fam198b | 1416805_at  | family with sequence similarity 198, member B                                     | 2.13 | 0.0098 |
| Fap     | 1417552_at  | fibroblast activation protein                                                     | 3.42 | 0.0109 |
| Fbln2   | 1423407_a_a | fibulin 2                                                                         | 2.14 | 0.0081 |
| Fbn1    | 1460208_at  | fibrillin 1                                                                       | 2.56 | 0.0033 |
| Fcer1g  | 1418340_at  | Fc receptor, IgE, high affinity I, gamma polypeptide                              | 2.07 | 0.0346 |
| Fcgr2b  | 1435477_s_a | Fc receptor, IgG, low affinity IIb                                                | 2.78 | 0.0023 |
| Fcgr2b  | 1451941_a_a | Fc receptor, IgG, low affinity IIb                                                | 2.12 | 0.0051 |
| Fcgr3   | 1448620_at  | Fc receptor, IgG, low affinity III                                                | 2.11 | 0.0063 |
| Fgf13   | 1418497_at  | fibroblast growth factor 13                                                       | 2.18 | 0.0019 |
| Fgfbp1  | 1419086_at  | fibroblast growth factor binding protein 1                                        | 3    | 0.0035 |
| Fn1     | 1426642_at  | fibronectin 1                                                                     | 2.92 | 0.0031 |
| Fscn1   | 1416514_a_a | fascin homolog 1, actin bundling protein (Strongylocentrotus purpuratus)          | 4.46 | 0.0064 |
| Fstl1   | 1448259_at  | follistatin-like 1                                                                | 2.58 | 0.003  |
| Gatm    | 1423569_at  | glycine amidinotransferase (L-arginine:glycine amidinotransferase)                | 2.01 | 0.0071 |
| Gcnt2   | 1425503_at  | glucosaminyl (N-acetyl) transferase 2, I-branching enzyme                         | 2.07 | 0.0069 |
| Gja1    | 1437992_x_a | gap junction protein, alpha 1                                                     | 3.25 | 0.0016 |
| Gja1    | 1415800_at  | gap junction protein, alpha 1                                                     | 3.23 | 0.0013 |

|           |             |                                                                                                  |      |        |
|-----------|-------------|--------------------------------------------------------------------------------------------------|------|--------|
| Gjb2      | 1423271_at  | gap junction protein, beta 2                                                                     | 2.25 | 0.0013 |
| Glipr1    | 1424927_at  | GLI pathogenesis-related 1 (glioma)                                                              | 2.71 | 0.0044 |
| Gpr176    | 1442116_at  | G protein-coupled receptor 176                                                                   | 2.48 | 0.003  |
| Gpx2      | 1449279_at  | glutathione peroxidase 2                                                                         | 3.81 | 0.001  |
| Gvin1     | 1429184_at  | GTPase, very large interferon inducible 1                                                        | 2.4  | 0.0225 |
| H2-Aa     | 1452431_s_a | histocompatibility 2, class II antigen A, alpha                                                  | 3.32 | 0.0133 |
| H2-Ab1    | 1425477_x_a | histocompatibility 2, class II antigen A, beta 1                                                 | 3.01 | 0.0035 |
| Hist1h2ae | 1438009_at  | histone cluster 1, H2ae                                                                          | 2.57 | 0.0036 |
| Hp        | 1448881_at  | haptoglobin                                                                                      | 3.33 | 0.0059 |
| Icam1     | 1424067_at  | intercellular adhesion molecule 1                                                                | 2.46 | 0.0043 |
| Idi1      | 1451122_at  | isopentenyl-diphosphate delta isomerase                                                          | 2.36 | 0.0077 |
| Ifi202b   | 1457666_s_a | interferon activated gene 202B                                                                   | 4.14 | 0.0405 |
| Ifi203    | 1448775_at  | interferon activated gene 203                                                                    | 2.1  | 0.0122 |
| Ifi205    | 1452348_s_a | interferon activated gene 205                                                                    | 3.21 | 0.0052 |
| Ifitm1    | 1424254_at  | interferon induced transmembrane protein 1                                                       | 2.26 | 0.0074 |
| Igf1      | 1437401_at  | insulin-like growth factor 1                                                                     | 2.27 | 0.048  |
| Igkv1-117 | 1460423_x_a | immunoglobulin kappa variable 1-117                                                              | 3.38 | 0.0197 |
| Il1b      | 1449399_a_a | interleukin 1 beta                                                                               | 3.24 | 0.0005 |
| Il4ra     | 1421034_a_a | interleukin 4 receptor, alpha                                                                    | 2.22 | 0.0047 |
| Inhbb     | 1426858_at  | inhibin beta-B                                                                                   | 3.02 | 0.0045 |
| Irg1      | 1427381_at  | immunosuppressive gene 1                                                                         | 2.22 | 0.0022 |
| Itgax     | 1419128_at  | integrin alpha X                                                                                 | 2.12 | 0.0019 |
| Itg2      | 1450678_at  | integrin beta 2                                                                                  | 2.19 | 0.0045 |
| Jag1      | 1421106_at  | jagged 1                                                                                         | 3.42 | 0.0004 |
| Krt14     | 1423935_x_a | keratin 14                                                                                       | 4.46 | 0.0078 |
| Krt17     | 1423227_at  | keratin 17                                                                                       | 12.3 | 0.004  |
| Krt5      | 1424096_at  | keratin 5                                                                                        | 2.18 | 0.0471 |
| Krt6a     | 1422784_at  | keratin 6A                                                                                       | 11.6 | 0.0025 |
| Lamb1     | 1424114_s_a | laminin B1                                                                                       | 2.31 | 0.0012 |
| Lbh       | 1429088_at  | limb-bud and heart                                                                               | 2.57 | 0.0032 |
| Lcn2      | 1427747_a_a | lipocalin 2                                                                                      | 2.88 | 0.0072 |
| Lgals1    | 1455439_a_a | lectin, galactose binding, soluble 1                                                             | 2.86 | 0.0028 |
| Lgals7    | 1422308_a_a | lectin, galactose binding, soluble 7                                                             | 2.31 | 0.0333 |
| Lhfp      | 1433776_at  | lipoma HMGIC fusion partner                                                                      | 2.7  | 0.0033 |
| Lilrb4    | 1420394_s_a | leukocyte immunoglobulin-like receptor, subfamily B, member 4                                    | 2.61 | 0.0011 |
| LOC624295 | 1427514_at  | uncharacterized LOC624295                                                                        | 2.33 | 0.0001 |
| Lox       | 1416121_at  | Lysyl oxidase                                                                                    | 3.23 | 0.0066 |
| Loxl2     | 1452436_at  | lysyl oxidase-like 2                                                                             | 2.73 | 0.0097 |
| Ltf       | 1450009_at  | lactotransferrin                                                                                 | 2.71 | 0.028  |
| Lyz1      | 1436996_x_a | lysozyme 1                                                                                       | 2.36 | 0.0016 |
| Lyz2      | 1423547_at  | lysozyme 2                                                                                       | 2.39 | 0.0016 |
| Mcm6      | 1416251_at  | minichromosome maintenance deficient 6 (MIS5 homolog, <i>S. pombe</i> ) ( <i>S. cerevisiae</i> ) | 2.28 | 0.0034 |
| Mki67     | 1426817_at  | antigen identified by monoclonal antibody Ki 67                                                  | 2.01 | 0.0015 |
| Mmp13     | 1417256_at  | matrix metalloproteinase 13                                                                      | 4.94 | 0.0274 |
| Mmp3      | 1418945_at  | matrix metalloproteinase 3                                                                       | 6.16 | 0.0005 |
| Mndal     | 1452231_x_a | myeloid nuclear differentiation antigen like                                                     | 2.58 | 0.012  |
| Mrc2      | 1421045_at  | mannose receptor, C type 2                                                                       | 2.06 | 0.025  |
| Ms4a6b    | 1418826_at  | membrane-spanning 4-domains, subfamily A, member 6B                                              | 2.22 | 0.0027 |
| Msn       | 1450379_at  | moesin                                                                                           | 3.75 | 0.001  |
| MsrB3     | 1454997_at  | methionine sulfoxide reductase B3                                                                | 2.11 | 0.0005 |
| Myo1b     | 1459679_s_a | myosin IB                                                                                        | 2.55 | 0.0048 |
| Naip1     | 1425298_a_a | NLR family, apoptosis inhibitory protein 1                                                       | 2.24 | 0.0055 |
| Ncapg     | 1429171_a_a | non-SMC condensin I complex, subunit G                                                           | 2.05 | 0.0056 |
| Ncf4      | 1418465_at  | neutrophil cytosolic factor 4                                                                    | 2.84 | 0.0007 |
| Nfkbie    | 1458299_s_a | nuclear factor of kappa light polypeptide gene enhancer in B cells inhibitor, epsilon            | 2.35 | 0.0171 |
| Nrarp     | 1417985_at  | Notch-regulated ankyrin repeat protein                                                           | 2.11 | 0.0045 |
| Olfml2b   | 1423915_at  | olfactomedin-like 2B                                                                             | 2.09 | 0.0021 |
| Osmr      | 1418674_at  | oncostatin M receptor                                                                            | 2.49 | 0.0005 |
| Palmd     | 1417251_at  | palmdelphin                                                                                      | 2.02 | 0.0116 |
| Pdgfrb    | 1436970_a_a | platelet derived growth factor receptor, beta polypeptide                                        | 2.72 | 0.0029 |
| Pdlim7    | 1428319_at  | PDZ and LIM domain 7                                                                             | 2.39 | 0.0081 |

|           |             |                                                                                  |      |          |
|-----------|-------------|----------------------------------------------------------------------------------|------|----------|
| Pdpn      | 1419309_at  | podoplanin                                                                       | 2.24 | 0.0002   |
| Pion      | 1427515_at  | pigeon homolog (Drosophila)                                                      | 2.22 | 0.0006   |
| Pla1a     | 1417785_at  | phospholipase A1 member A                                                        | 2.25 | 0.0181   |
| Pla2g7    | 1430700_a_a | phospholipase A2, group VII (platelet-activating factor acetylhydrolase, plasma) | 2.83 | 0.0041   |
| Plek      | 1448748_at  | pleckstrin                                                                       | 2.34 | 0.0025   |
| Plek      | 1448749_at  | pleckstrin                                                                       | 2.06 | 0.0046   |
| Plod2     | 1416687_at  | procollagen lysine, 2-oxoglutarate 5-dioxygenase 2                               | 2.25 | 0.0225   |
| Postn     | 1423606_at  | periostin, osteoblast specific factor                                            | 4    | 0.0036   |
| Ppic      | 1416498_at  | peptidylprolyl isomerase C                                                       | 2.43 | 0.0011   |
| Ptgs2     | 1417262_at  | prostaglandin-endoperoxide synthase 2                                            | 3.27 | 0.0435   |
| Ptprc     | 1422124_a_a | protein tyrosine phosphatase, receptor type, C                                   | 3.04 | 0.0016   |
| Pxdn      | 1428259_at  | peroxidasin homolog (Drosophila)                                                 | 2.58 | 0.0006   |
| Pyhin1    | 1435330_at  | pyrin and HIN domain family, member 1                                            | 2    | 0.0182   |
| Rbp1      | 1448754_at  | retinol binding protein 1, cellular                                              | 2.44 | 0.0049   |
| Rftn1     | 1428696_at  | raftlin lipid raft linker 1                                                      | 2.08 | 0.0013   |
| Rgs4      | 1416286_at  | regulator of G-protein signaling 4                                               | 4.85 | 0.000014 |
| Rgs4      | 1416287_at  | regulator of G-protein signaling 4                                               | 2.05 | 0.0003   |
| Rpgrip1   | 1421144_at  | retinitis pigmentosa GTPase regulator interacting protein 1                      | 4.66 | 0.0311   |
| Rrm2      | 1434437_x_a | ribonucleotide reductase M2                                                      | 2.62 | 0.0009   |
| Rrm2      | 1448226_at  | ribonucleotide reductase M2                                                      | 2.43 | 0.0028   |
| S100a8    | 1419394_s_a | S100 calcium binding protein A8 (calgranulin A)                                  | 4.91 | 0.0234   |
| S100a9    | 1448756_at  | S100 calcium binding protein A9 (calgranulin B)                                  | 4.8  | 0.0165   |
| S1pr3     | 1438658_a_a | sphingosine-1-phosphate receptor 3                                               | 2.12 | 0.0196   |
| Saa3      | 1450826_a_a | serum amyloid A 3                                                                | 3.84 | 0.0056   |
| Samd4     | 1436356_at  | sterile alpha motif domain containing 4                                          | 2.08 | 0.0053   |
| Sept11    | 1429234_s_a | septin 11                                                                        | 2    | 0.0026   |
| Serpine1  | 1419149_at  | serine (or cysteine) peptidase inhibitor, clade E, member 1                      | 2.58 | 0.0004   |
| Serpinh1  | 1450843_a_a | serine (or cysteine) peptidase inhibitor, clade H, member 1                      | 3.05 | 0.0028   |
| Sftpd     | 1420378_at  | surfactant associated protein D                                                  | 3.49 | 0.0182   |
| Slc15a3   | 1420697_at  | solute carrier family 15, member 3                                               | 2.23 | 0.0016   |
| Slc16a1   | 1415802_at  | solute carrier family 16 (monocarboxylic acid transporters), member 1            | 2.52 | 0.0015   |
| Slc5a8    | 1425606_at  | solute carrier family 5 (iodide transporter), member 8                           | 3.01 | 0.0143   |
| Slfn4     | 1427102_at  | schlafen 4                                                                       | 4.43 | 0.0004   |
| Slpi      | 1448377_at  | secretory leukocyte peptidase inhibitor                                          | 2.5  | 0.0046   |
| Socs3     | 1455899_x_a | suppressor of cytokine signaling 3                                               | 3.38 | 0.0013   |
| Sparc     | 1416589_at  | secreted acidic cysteine rich glycoprotein                                       | 2.15 | 0.0227   |
| Spon1     | 1451342_at  | spondin 1, (f-spondin) extracellular matrix protein                              | 4.84 | 0.0191   |
| Spp1      | 1449254_at  | secreted phosphoprotein 1                                                        | 10.7 | 0.0003   |
| Sspn      | 1417644_at  | sarcospan                                                                        | 2.09 | 0.0039   |
| Steap4    | 1425829_a_a | STEAP family member 4                                                            | 2.14 | 0.041    |
| Stfa1     | 1435761_at  | stefin A1                                                                        | 5.47 | 0.0022   |
| Tgfb1     | 1448123_s_a | transforming growth factor, beta induced                                         | 3.43 | 0.0027   |
| Thbs1     | 1460302_at  | thrombospondin 1                                                                 | 3.64 | 0.0045   |
| Thbs2     | 1422571_at  | thrombospondin 2                                                                 | 7.23 | 0.0004   |
| Timp1     | 1460227_at  | tissue inhibitor of metalloproteinase 1                                          | 3.59 | 0.0057   |
| Tm4sf1    | 1450958_at  | transmembrane 4 superfamily member 1                                             | 3.81 | 0.0028   |
| Tnc       | 1416342_at  | tenascin C                                                                       | 7.04 | 0.0002   |
| Tnfaip2   | 1438855_x_a | tumor necrosis factor, alpha-induced protein 2                                   | 3.94 | 0.0019   |
| Tnfaip3   | 1433699_at  | tumor necrosis factor, alpha-induced protein 3                                   | 2.24 | 0.0029   |
| Tnfrsf12a | 1418572_x_a | tumor necrosis factor receptor superfamily, member 12a                           | 2.32 | 0.0044   |
| Top2a     | 1454694_a_a | topoisomerase (DNA) II alpha                                                     | 2.61 | 0.0002   |
| Tpm4      | 1433883_at  | tropomyosin 4                                                                    | 2.35 | 0.0019   |
| Trf       | 1425546_a_a | transferrin                                                                      | 2.19 | 0.0018   |
| Ttc9      | 1455649_at  | tetratricopeptide repeat domain 9                                                | 2.2  | 0.0072   |
| Tubb6     | 1416431_at  | tubulin, beta 6 class V                                                          | 3    | 0.0092   |
| Tyrobp    | 1450792_at  | TYRO protein tyrosine kinase binding protein                                     | 2.56 | 0.0037   |
| Ubd       | 1419762_at  | ubiquitin D                                                                      | 2.69 | 0.0448   |
| Ube2c     | 1452954_at  | ubiquitin-conjugating enzyme E2C                                                 | 2.72 | 0.0039   |
| Uhrf1     | 1415810_at  | ubiquitin-like, containing PHD and RING finger domains, 1                        | 2.16 | 0.0008   |
| Vcan      | 1421694_a_a | versican                                                                         | 3.85 | 0.0003   |
| Vim       | 1456292_a_a | vimentin                                                                         | 2.2  | 0.0032   |

Wisp1

1448594\_at WNT1 inducible signaling pathway protein 1

2.38

0.0022
