# Supplementary material
Source: PubMed Central journal article supplement (PMC4707102)
Supplement: NIHMS733225-supplement-5.pdf [file NIHMS733225-supplement-5.pdf]

Supplementary Table S4

| Symbo         | Probe ID     | Description                                                      | Fold Change | P-Value  | adj.P.Val |
|---------------|--------------|------------------------------------------------------------------|-------------|----------|-----------|
| 1110059G02Rik | 1436203_a_at | RIKEN cDNA 1110059G02 gene                                       | 4.89        | 0.000001 | 0.000011  |
| 1190003J15Rik | 1431786_s_at | RIKEN cDNA 1190003J15 gene                                       | 6.06        | 0.000000 | 0.000007  |
| 1190003J15Rik | 1455186_a_at | RIKEN cDNA 1190003J15 gene                                       | 5.84        | 0.000000 | 0.000006  |
| 1420136_a_at  | 1420136_a_at | ---                                                              | 4.03        | 0.000001 | 0.000015  |
| 1434025_at    | 1434025_at   | ---                                                              | 4.50        | 0.000017 | 0.000111  |
| 1439734_at    | 1439734_at   | ---                                                              | 5.05        | 0.000000 | 0.000003  |
| 1440645_at    | 1440645_at   | ---                                                              | 5.49        | 0.009435 | 0.019707  |
| 1441644_at    | 1441644_at   | ---                                                              | 4.25        | 0.000001 | 0.000012  |
| 1441971_at    | 1441971_at   | ---                                                              | 4.90        | 0.000001 | 0.000009  |
| 1442350_at    | 1442350_at   | ---                                                              | 4.42        | 0.000000 | 0.000003  |
| 1442682_at    | 1442682_at   | ---                                                              | 4.01        | 0.000001 | 0.000009  |
| 1442936_at    | 1442936_at   | ---                                                              | 4.43        | 0.000044 | 0.000228  |
| 1443332_at    | 1443332_at   | ---                                                              | 5.39        | 0.000061 | 0.000293  |
| 1443337_at    | 1443337_at   | ---                                                              | 5.91        | 0.000016 | 0.000104  |
| 1443509_at    | 1443509_at   | ---                                                              | 5.87        | 0.000001 | 0.000009  |
| 1444479_at    | 1444479_at   | ---                                                              | 5.93        | 0.000001 | 0.000010  |
| 1445256_at    | 1445256_at   | ---                                                              | 4.87        | 0.000000 | 0.000005  |
| 1445414_at    | 1445414_at   | ---                                                              | 4.01        | 0.000001 | 0.000016  |
| 1446406_at    | 1446406_at   | ---                                                              | 4.02        | 0.000001 | 0.000015  |
| 1447166_at    | 1447166_at   | ---                                                              | 4.67        | 0.000033 | 0.000181  |
| 1447173_at    | 1447173_at   | ---                                                              | 6.69        | 0.000132 | 0.000547  |
| 1447227_at    | 1447227_at   | ---                                                              | 5.31        | 0.000002 | 0.000024  |
| 1447891_at    | 1447891_at   | ---                                                              | 5.83        | 0.000073 | 0.000338  |
| 1455961_at    | 1455961_at   | ---                                                              | 6.28        | 0.000001 | 0.000015  |
| 1457191_at    | 1457191_at   | ---                                                              | 4.63        | 0.000000 | 0.000003  |
| 1458599_at    | 1458599_at   | ---                                                              | 5.26        | 0.000001 | 0.000013  |
| 1458706_at    | 1458706_at   | ---                                                              | 4.02        | 0.000013 | 0.000087  |
| 1459495_at    | 1459495_at   | ---                                                              | 4.22        | 0.000000 | 0.000003  |
| 1600029D21Rik | 1454254_s_at | RIKEN cDNA 1600029D21 gene                                       | 6.06        | 0.000010 | 0.000071  |
| 1810011O10Rik | 1435595_at   | RIKEN cDNA 1810011O10 gene                                       | 4.04        | 0.000001 | 0.000009  |
| 1810019J16Rik | 1417797_a_at | RIKEN cDNA 1810019J16 gene                                       | 5.90        | 0.000000 | 0.000001  |
| 2010107G23Rik | 1424072_at   | RIKEN cDNA 2010107G23 gene                                       | 4.67        | 0.000002 | 0.000019  |
| 2010300C02Rik | 1452861_at   | RIKEN cDNA 2010300C02 gene                                       | 6.30        | 0.000001 | 0.000014  |
| 2200002D01Rik | 1428671_at   | RIKEN cDNA 2200002D01 gene                                       | 4.11        | 0.000001 | 0.000010  |
| 2210409D07Rik | 1432559_at   | RIKEN cDNA 2210409D07 gene                                       | 4.70        | 0.000000 | 0.000001  |
| 2210409O19Rik | 1432755_at   | RIKEN cDNA 2210409O19 gene                                       | 4.34        | 0.000024 | 0.000140  |
| 2210411A11Rik | 1456146_at   | RIKEN cDNA 2210411A11 gene                                       | 4.07        | 0.000000 | 0.000005  |
| 2310030G06Rik | 1449357_at   | RIKEN cDNA 2310030G06 gene                                       | 6.16        | 0.000001 | 0.000012  |
| 2510049J12Rik | 1440916_at   | RIKEN cDNA 2510049J12 gene                                       | 7.02        | 0.000002 | 0.000025  |
| 2610528A11Rik | 1435639_at   | RIKEN cDNA 2610528A11 gene                                       | 5.29        | 0.002054 | 0.005344  |
| 2610528J11Rik | 1450947_at   | RIKEN cDNA 2610528J11 gene                                       | 5.09        | 0.000000 | 0.000002  |
| 4633401B06Rik | 1429822_at   | RIKEN cDNA 4633401B06 gene                                       | 4.24        | 0.000000 | 0.000001  |
| 4921506M07Rik | 1457349_at   | RIKEN cDNA 4921506M07 gene /// tetratricopeptide repeat domain 6 | 4.82        | 0.000007 | 0.000053  |
| 4930550L11Rik | 1444740_at   | ceramide synthase 3                                              | 6.54        | 0.000013 | 0.000088  |
| 5330417C22Rik | 1427063_at   | RIKEN cDNA 5330417C22 gene                                       | 6.11        | 0.001609 | 0.004344  |
| 9130008F23Rik | 1430221_at   | RIKEN cDNA 9130008F23 gene                                       | 4.42        | 0.000000 | 0.000004  |
| 9130409J20Rik | 1460517_at   | RIKEN cDNA 9130409J20 gene                                       | 5.17        | 0.000001 | 0.000011  |
| 9530002B09Rik | 1419242_at   | RIKEN cDNA 9530002B09 gene                                       | 6.30        | 0.083353 | 0.127688  |
| AA986860      | 1433610_at   | expressed sequence AA986860                                      | 7.86        | 0.000015 | 0.000099  |
| AcsM3         | 1425559_a_at | acyl-CoA synthetase medium-chain family member 3                 | 4.34        | 0.000002 | 0.000023  |
| Agr2          | 1419268_at   | anterior gradient 2 (Xenopus laevis)                             | 6.76        | 0.000210 | 0.000793  |
| Al661453      | 1425163_at   | expressed sequence Al661453                                      | 4.41        | 0.000008 | 0.000061  |
| Aim1          | 1437813_at   | absent in melanoma 1-like                                        | 4.79        | 0.000000 | 0.000005  |
| Aldh1a7       | 1418601_at   | aldehyde dehydrogenase family 1, subfamily A7                    | 6.85        | 0.000008 | 0.000060  |
| Aldh3a1       | 1418752_at   | aldehyde dehydrogenase family 3, subfamily A1                    | 6.00        | 0.000002 | 0.000018  |
| Aldoc         | 1451461_a_at | aldolase C, fructose-bisphosphate                                | 4.09        | 0.000000 | 0.000003  |
| Alox12        | 1422699_at   | arachidonate 12-lipoxygenase                                     | 5.52        | 0.000000 | 0.000007  |
| Ank3          | 1452872_at   | ankyrin 3, epithelial                                            | 4.27        | 0.000000 | 0.000000  |
| Ano1          | 1426571_at   | anoctamin 1, calcium activated chloride channel                  | 4.88        | 0.000002 | 0.000022  |
| Anxa1         | 1444016_at   | annexin A1                                                       | 5.11        | 0.000078 | 0.000355  |
| Anxa13        | 1424959_at   | annexin A13                                                      | 6.15        | 0.002360 | 0.006001  |
| Ap1m2         | 1460190_at   | adaptor protein complex AP-1, mu 2 subunit                       | 4.80        | 0.000003 | 0.000027  |
| ApoF          | 1418239_at   | apolipoprotein F                                                 | 6.34        | 0.000089 | 0.000395  |
| ApoL7a        | 1453080_at   | apolipoprotein L 7a                                              | 6.70        | 0.000014 | 0.000092  |
| ApoL9a        | 1424518_at   | apolipoprotein L 9a                                              | 4.53        | 0.000001 | 0.000011  |
| Aqp4          | 1434449_at   | aquaporin 4                                                      | 5.72        | 0.003032 | 0.007417  |
| Arhgef16      | 1427386_at   | Rho guanine nucleotide exchange factor (GEF) 16                  | 5.15        | 0.000000 | 0.000005  |
| Arl14         | 1430234_at   | ADP-ribosylation factor-like 14                                  | 6.10        | 0.000640 | 0.002004  |
| Aspa          | 1418472_at   | aspartoacylase                                                   | 6.87        | 0.000005 | 0.000042  |
| Atp10b        | 1453352_at   | ATPase, class V, type 10B                                        | 4.99        | 0.000000 | 0.000008  |
| Atp1b1        | 1418453_a_at | ATPase, Na+/K+ transporting, beta 1 polypeptide                  | 4.89        | 0.000058 | 0.000282  |
| Atp2c2        | 1452326_at   | ATPase, Ca++ transporting, type 2C, member 2                     | 7.02        | 0.000005 | 0.000041  |
| B430316J06Rik | 1439933_at   | RIKEN cDNA B430316J06 gene                                       | 4.72        | 0.000000 | 0.000008  |
| B4galnt2      | 1442028_at   | beta-1,4-N-acetyl-galactosaminyl transferase 2                   | 5.21        | 0.000017 | 0.000110  |

|                    |              |                                                                                       |       |          |          |
|--------------------|--------------|---------------------------------------------------------------------------------------|-------|----------|----------|
| Baiap2l1           | 1424951_at   | BAI1-associated protein 2-like 1                                                      | 4.14  | 0.000006 | 0.000049 |
| Barx2              | 1421761_a_at | BarH-like homeobox 2                                                                  | 5.73  | 0.000004 | 0.000035 |
| Bbox1              | 1459030_at   | butyrobetaine (gamma), 2-oxoglutarate dioxygenase 1 (gamma-butyrobetaine hydroxylase) | 4.64  | 0.000016 | 0.000102 |
| BC016579           | 1424941_at   | cDNA sequence, BC016579                                                               | 5.49  | 0.000002 | 0.000026 |
| BC030870           | 1459904_at   | cDNA sequence BC030870                                                                | 6.67  | 0.000005 | 0.000045 |
| BC064078           | 1444632_at   | cDNA sequence BC064078                                                                | 4.13  | 0.000000 | 0.000005 |
| BC100530 /// Stfa1 | 1435761_at   | cDNA sequence BC100530 /// stefin A1                                                  | 4.15  | 0.000228 | 0.000850 |
| Bcl2l14            | 1429347_at   | BCL2-like 14 (apoptosis facilitator)                                                  | 4.42  | 0.000008 | 0.000062 |
| Bcl2l15            | 1452614_at   | BCL2-like 15                                                                          | 4.20  | 0.000005 | 0.000046 |
| Bdh1               | 1452257_at   | 3-hydroxybutyrate dehydrogenase, type 1                                               | 4.14  | 0.000000 | 0.000003 |
| Bex1               | 1448595_a_at | brain expressed gene 1                                                                | 4.66  | 0.001265 | 0.003541 |
| Bik                | 1420362_a_at | BCL2-interacting killer                                                               | 5.34  | 0.000004 | 0.000036 |
| Bnc1               | 1424890_at   | basonuclin 1                                                                          | 4.74  | 0.000002 | 0.000021 |
| Bnpl               | 1420683_at   | BCL2/adenovirus E1B 19kD interacting protein like                                     | 4.55  | 0.000000 | 0.000003 |
| Bspry              | 1450131_a_at | B-box and SPRY domain containing                                                      | 4.58  | 0.000003 | 0.000028 |
| C77080             | 1433775_at   | expressed sequence C77080                                                             | 4.14  | 0.000001 | 0.000010 |
| Cadps              | 1448955_s_at | Ca2+-dependent secretion activator                                                    | 4.57  | 0.000133 | 0.000549 |
| Cadps2             | 1451499_at   | Ca2+-dependent activator protein for secretion 2                                      | 5.35  | 0.000003 | 0.000030 |
| Calcb              | 1422639_at   | calcitonin-related polypeptide, beta                                                  | 5.55  | 0.000059 | 0.000286 |
| Camsap3            | 1432464_a_at | calmodulin regulated spectrin-associated protein family, member 3                     | 4.85  | 0.000007 | 0.000058 |
| Capn13             | 1437960_at   | calpain 13                                                                            | 4.64  | 0.000001 | 0.000011 |
| Capn5              | 1418671_at   | calpain 5                                                                             | 4.54  | 0.000006 | 0.000048 |
| Capsl              | 1429891_at   | calcyphosine-like                                                                     | 8.91  | 0.000000 | 0.000003 |
| Car12              | 1428485_at   | carbonic anhydrase 12                                                                 | 6.38  | 0.000027 | 0.000157 |
| Car2               | 1448752_at   | carbonic anhydrase 2                                                                  | 4.68  | 0.000038 | 0.000204 |
| Car8               | 1427482_a_at | carbonic anhydrase 8                                                                  | 6.39  | 0.000036 | 0.000194 |
| Casz1              | 1459054_at   | castor zinc finger 1                                                                  | 4.84  | 0.000001 | 0.000011 |
| Catsperd           | 1434726_at   | catsper channel auxiliary subunit delta                                               | 6.20  | 0.000020 | 0.000121 |
| Cblc               | 1422666_at   | Casitas B-lineage lymphoma c                                                          | 6.03  | 0.000018 | 0.000112 |
| Ccdc120            | 1428066_at   | coiled-coil domain containing 120                                                     | 4.74  | 0.000001 | 0.000011 |
| Ccdc3              | 1428549_at   | coiled-coil domain containing 3                                                       | 4.95  | 0.000001 | 0.000010 |
| Ccdc64b            | 1460051_at   | coiled-coil domain containing 64B                                                     | 5.70  | 0.000000 | 0.000000 |
| Ccl20              | 1422029_at   | chemokine (C-C motif) ligand 20                                                       | 5.38  | 0.000081 | 0.000370 |
| Ccser1             | 1437306_at   | coiled-coil serine rich 1                                                             | 4.31  | 0.000000 | 0.000001 |
| Cd200r3            | 1453813_at   | CD200 receptor 3                                                                      | 7.20  | 0.001311 | 0.003650 |
| Cdcp1              | 1427095_at   | CUB domain containing protein 1                                                       | 5.69  | 0.000000 | 0.000006 |
| Ceacam1            | 1427711_a_at | carcinoembryonic antigen-related cell adhesion molecule 1                             | 6.82  | 0.000024 | 0.000143 |
| Celsr1             | 1418925_at   | cadherin, EGF LAG seven-pass G-type receptor 1 (flamingo homolog, Drosophila)         | 5.38  | 0.000002 | 0.000023 |
| Celsr2             | 1435336_at   | cadherin, EGF LAG seven-pass G-type receptor 2 (flamingo homolog, Drosophila)         | 4.06  | 0.000000 | 0.000002 |
| Ces1d              | 1435370_a_at | carboxylesterase 1D                                                                   | 5.06  | 0.000126 | 0.000525 |
| Cftr               | 1420579_s_at | cystic fibrosis transmembrane conductance regulator                                   | 5.62  | 0.000000 | 0.000002 |
| Cgn                | 1435155_at   | cingulin                                                                              | 5.01  | 0.000000 | 0.000004 |
| Chchd10            | 1436990_s_at | coiled-coil-helix-coiled-coil-helix domain containing 10                              | 4.44  | 0.000001 | 0.000016 |
| Chdh               | 1455435_s_at | choline dehydrogenase                                                                 | 5.51  | 0.000000 | 0.000004 |
| Chmp4c             | 1420517_at   | charged multivesicular body protein 4C                                                | 7.37  | 0.000014 | 0.000096 |
| Chodl              | 1451440_at   | chondrolectin                                                                         | 5.50  | 0.000005 | 0.000043 |
| Cited4             | 1425400_a_at | Cbp/p300-interacting transactivator, with Glu/Asp-rich carboxy-terminal domain, 4     | 5.25  | 0.000002 | 0.000020 |
| Ckmt1              | 1417089_a_at | creatine kinase, mitochondrial 1, ubiquitous                                          | 7.29  | 0.000033 | 0.000181 |
| Clca1 /// Clca2    | 1460259_s_at | chloride channel calcium activated 1 /// chloride channel calcium activated 2         | 4.80  | 0.000153 | 0.000614 |
| Clca2              | 1437578_at   | chloride channel calcium activated 2                                                  | 7.61  | 0.000009 | 0.000065 |
| Clca3              | 1416306_at   | chloride channel calcium activated 3                                                  | 11.46 | 0.000009 | 0.000066 |
| Cldn23             | 1424409_at   | claudin 23                                                                            | 7.22  | 0.000071 | 0.000332 |
| Cldn3              | 1426332_a_at | claudin 3                                                                             | 7.12  | 0.000003 | 0.000028 |
| Cldn4              | 1418283_at   | claudin 4                                                                             | 5.41  | 0.000022 | 0.000133 |
| Cldn7              | 1448393_at   | claudin 7                                                                             | 5.95  | 0.000005 | 0.000043 |
| Cldn8              | 1449091_at   | claudin 8                                                                             | 6.16  | 0.000192 | 0.000737 |
| Clic6              | 1454866_s_at | chloride intracellular channel 6                                                      | 5.14  | 0.000012 | 0.000085 |
| Clmn               | 1429166_s_at | calmin                                                                                | 5.72  | 0.000014 | 0.000094 |
| Cmb1               | 1451322_at   | carboxymethylenebutenolidase-like (Pseudomonas)                                       | 4.45  | 0.000005 | 0.000040 |
| Cnksr1             | 1455399_at   | connector enhancer of kinase suppressor of Ras 1                                      | 4.12  | 0.000000 | 0.000003 |
| Cobl               | 1434917_at   | cordons-bleu WH2 repeat                                                               | 4.77  | 0.000000 | 0.000002 |
| Cobl1              | 1454795_at   | Cobl-like 1                                                                           | 4.09  | 0.000007 | 0.000054 |
| Col17a1            | 1418799_a_at | collagen, type XVII, alpha 1                                                          | 5.72  | 0.000002 | 0.000023 |
| CRABP1             | 1448326_a_at | cellular retinoic acid binding protein I                                              | 6.47  | 0.000227 | 0.000847 |
| Crb3               | 1434851_s_at | crumbs homolog 3 (Drosophila)                                                         | 5.20  | 0.000002 | 0.000021 |
| Csta               | 1435760_at   | cystatin A                                                                            | 7.06  | 0.000147 | 0.000593 |
| Cxadr              | 1453282_at   | coxsackie virus and adenovirus receptor                                               | 5.49  | 0.000001 | 0.000012 |
| Cxcl17             | 1451610_at   | chemokine (C-X-C motif) ligand 17                                                     | 6.12  | 0.000002 | 0.000019 |
| Cxcl5              | 1419728_at   | chemokine (C-X-C motif) ligand 5                                                      | 4.11  | 0.000772 | 0.002340 |
| Cyp2b10            | 1425645_s_at | cytochrome P450, family 2, subfamily b, polypeptide 10                                | 7.09  | 0.000006 | 0.000046 |
| Cyp2f2             | 1448792_a_at | cytochrome P450, family 2, subfamily f, polypeptide 2                                 | 6.37  | 0.000015 | 0.000098 |
| Cystm1             | 1427878_at   | cysteine-rich transmembrane module containing 1                                       | 4.09  | 0.000009 | 0.000065 |
| D10Bwg1379e        | 1435050_at   | DNA segment, Chr 10, Brigham & Women's Genetics 1379 expressed                        | 4.64  | 0.000069 | 0.000323 |
| D630039A03Rik      | 1437085_at   | RIKEN cDNA D630039A03 gene                                                            | 4.86  | 0.000000 | 0.000004 |
| Dach2              | 1449823_at   | dachshund 2 (Drosophila)                                                              | 4.41  | 0.000021 | 0.000129 |
| DAPL1              | 1453568_at   | death associated protein-like 1                                                       | 6.61  | 0.000006 | 0.000048 |

|                  |              |                                                                                  |      |          |          |
|------------------|--------------|----------------------------------------------------------------------------------|------|----------|----------|
| Defb1            | 1419491_at   | defensin beta 1                                                                  | 4.72 | 0.005827 | 0.013005 |
| Dennd2d          | 1451363_a_at | DENN/MADD domain containing 2D                                                   | 4.17 | 0.000001 | 0.000009 |
| Dmbt1            | 1418287_a_at | deleted in malignant brain tumors 1                                              | 4.45 | 0.078994 | 0.122023 |
| Dnase112         | 1450936_a_at | deoxyribonuclease 1-like 2                                                       | 6.36 | 0.000001 | 0.000016 |
| Dnase2a          | 1430135_at   | deoxyribonuclease II alpha                                                       | 4.23 | 0.000002 | 0.000023 |
| Dsc2             | 1426911_at   | desmocollin 2                                                                    | 6.14 | 0.000000 | 0.000002 |
| Dsc3             | 1434534_at   | desmocollin 3                                                                    | 4.91 | 0.000001 | 0.000018 |
| Dsg2             | 1425619_s_at | desmoglein 2                                                                     | 6.24 | 0.000001 | 0.000015 |
| Dst              | 1421117_at   | dystonin                                                                         | 4.29 | 0.000003 | 0.000030 |
| Edn1             | 1451924_a_at | endothelin 1                                                                     | 5.10 | 0.000002 | 0.000019 |
| Efna1            | 1448510_at   | ephrin A1                                                                        | 4.05 | 0.000003 | 0.000026 |
| Efnb2            | 1419638_at   | ephrin B2                                                                        | 5.00 | 0.000001 | 0.000011 |
| Egf              | 1418093_a_at | epidermal growth factor                                                          | 5.55 | 0.000224 | 0.000835 |
| Ehf              | 1419474_a_at | ets homologous factor                                                            | 6.31 | 0.000004 | 0.000037 |
| Elf3             | 1416916_at   | E74-like factor 3                                                                | 5.54 | 0.000021 | 0.000129 |
| Elf5             | 1419555_at   | E74-like factor 5                                                                | 4.40 | 0.001855 | 0.004896 |
| Elmo3            | 1434489_at   | engulfment and cell motility 3                                                   | 4.75 | 0.000001 | 0.000015 |
| Elov7            | 1424097_at   | ELOVL family member 7, elongation of long chain fatty acids (yeast)              | 6.20 | 0.000005 | 0.000041 |
| Enpp5            | 1425702_a_at | ectonucleotide pyrophosphatase/phosphodiesterase 5                               | 5.10 | 0.000000 | 0.000005 |
| Entpd8           | 1429550_at   | ectonucleoside triphosphate diphosphohydrolase 8                                 | 4.25 | 0.000003 | 0.000026 |
| Epb4.1l4a        | 1449167_at   | erythrocyte protein band 4.1-like 4a                                             | 5.38 | 0.000000 | 0.000004 |
| Epb4.1l4b        | 1418294_at   | erythrocyte protein band 4.1-like 4b                                             | 4.85 | 0.000030 | 0.000168 |
| Epcam            | 1416579_a_at | epithelial cell adhesion molecule                                                | 4.44 | 0.000017 | 0.000111 |
| Epha4            | 1429021_at   | Eph receptor A4                                                                  | 6.19 | 0.000002 | 0.000024 |
| Eppk1            | 1427537_at   | epioplakin 1                                                                     | 5.55 | 0.000001 | 0.000009 |
| Erb3             | 1434606_at   | v-erb-b2 erythroblastic leukemia viral oncogene homolog 3 (avian)                | 5.11 | 0.000000 | 0.000003 |
| Ersp1            | 1454681_at   | epithelial splicing regulatory protein 1                                         | 6.39 | 0.000000 | 0.000006 |
| Ersp2            | 1433683_at   | epithelial splicing regulatory protein 2                                         | 5.38 | 0.000000 | 0.000002 |
| Esrrg            | 1457896_at   | estrogen-related receptor gamma                                                  | 6.33 | 0.000001 | 0.000016 |
| Esrrg            | 1455267_at   | estrogen-related receptor gamma                                                  | 5.77 | 0.000010 | 0.000074 |
| Eva1a            | 1424652_at   | eva-1 homolog A (C. elegans)                                                     | 5.07 | 0.000007 | 0.000054 |
| Exph5            | 1441214_at   | exophilin 5                                                                      | 4.27 | 0.000009 | 0.000065 |
| Eya2             | 1424127_at   | eyes absent 2 homolog (Drosophila)                                               | 4.47 | 0.000001 | 0.000017 |
| Fam174b          | 1434273_at   | family with sequence similarity 174, member B                                    | 4.20 | 0.000056 | 0.000275 |
| Fam3b            | 1425122_at   | family with sequence similarity 3, member B                                      | 6.68 | 0.000262 | 0.000952 |
| Fam83e           | 1430717_at   | family with sequence similarity 83, member E                                     | 4.61 | 0.000001 | 0.000012 |
| Fam83e           | 1439430_x_at | family with sequence similarity 83, member E                                     | 4.21 | 0.000000 | 0.000002 |
| Fam83h           | 1452273_at   | family with sequence similarity 83, member H                                     | 4.99 | 0.000003 | 0.000033 |
| Fam84a           | 1425452_s_at | family with sequence similarity 84, member A                                     | 6.91 | 0.000001 | 0.000014 |
| Fat2             | 1457135_at   | FAT tumor suppressor homolog 2 (Drosophila)                                      | 4.19 | 0.000000 | 0.000003 |
| Ffar4            | 1439489_at   | free fatty acid receptor 4                                                       | 5.61 | 0.000000 | 0.000001 |
| Fgfr13           | 1418497_at   | fibroblast growth factor 13                                                      | 4.13 | 0.000002 | 0.000024 |
| Fgfr2            | 1433489_s_at | fibroblast growth factor receptor 2                                              | 5.06 | 0.000002 | 0.000023 |
| Fgfr3            | 1421841_at   | fibroblast growth factor receptor 3                                              | 5.24 | 0.000001 | 0.000010 |
| Foxa1            | 1418496_at   | forkhead box A1                                                                  | 5.07 | 0.000002 | 0.000026 |
| Foxq1            | 1438558_x_at | forkhead box Q1                                                                  | 6.97 | 0.000046 | 0.000237 |
| Frk              | 1421362_a_at | fyn-related kinase                                                               | 4.72 | 0.000042 | 0.000221 |
| Frk              | 1426569_a_at | fyn-related kinase                                                               | 4.00 | 0.000007 | 0.000057 |
| Fut9             | 1457409_at   | fucosyltransferase 9                                                             | 6.72 | 0.000001 | 0.000010 |
| Fxyd3            | 1418374_at   | FXD domain-containing ion transport regulator 3                                  | 4.56 | 0.000012 | 0.000081 |
| Fxyd4            | 1418207_at   | FXD domain-containing ion transport regulator 4                                  | 6.60 | 0.000072 | 0.000334 |
| Fzd6             | 1417301_at   | frizzled homolog 6 (Drosophila)                                                  | 4.24 | 0.000000 | 0.000007 |
| Gabrp            | 1451424_at   | gamma-aminobutyric acid (GABA) A receptor, pi                                    | 6.85 | 0.000000 | 0.000004 |
| Gabrp            | 1424647_at   | gamma-aminobutyric acid (GABA) A receptor, pi                                    | 5.04 | 0.000017 | 0.000108 |
| GATA3            | 1448886_at   | GATA binding protein 3                                                           | 6.46 | 0.000006 | 0.000047 |
| Gdpd1            | 1424076_at   | glycerophosphodiester phosphodiesterase domain containing 1                      | 4.18 | 0.000001 | 0.000018 |
| Gfra1            | 1439015_at   | glial cell line derived neurotrophic factor family receptor alpha 1              | 4.44 | 0.000000 | 0.000004 |
| Gipc2            | 1417178_at   | GIPC PDZ domain containing family, member 2                                      | 4.93 | 0.000000 | 0.000005 |
| gjb2             | 1423271_at   | gap junction protein, beta 2                                                     | 6.58 | 0.000002 | 0.000026 |
| Gm16136          | 1429086_at   | predicted gene 16136                                                             | 5.37 | 0.000002 | 0.000020 |
| Gm3579 /// LOC67 | 1431214_at   | predicted gene 3579 /// murine leukemia retrovirus                               | 4.69 | 0.000081 | 0.000369 |
| Gm5480           | 1439560_x_at | predicted gene 5480                                                              | 5.91 | 0.000016 | 0.000102 |
| Gm8096 /// Phgdh | 1426657_s_at | 3-phosphoglycerate dehydrogenase pseudogene /// 3-phosphoglycerate dehydrogenase | 5.67 | 0.000001 | 0.000011 |
| Gm8096 /// Phgdh | 1434158_at   | GDP-mannose 4, 6-dehydratase                                                     | 4.61 | 0.000001 | 0.000010 |
| Gp2              | 1449452_a_at | glycoprotein 2 (zymogen granule membrane)                                        | 4.01 | 0.000122 | 0.000511 |
| Gpr126           | 1437409_s_at | G protein-coupled receptor 126                                                   | 4.02 | 0.000000 | 0.000001 |
| Gpr87            | 1420364_at   | G protein-coupled receptor 87                                                    | 4.33 | 0.000034 | 0.000186 |
| Gpx2             | 1449279_at   | glutathione peroxidase 2                                                         | 5.60 | 0.003504 | 0.008396 |
| Grb7             | 1448227_at   | growth factor receptor bound protein 7                                           | 4.43 | 0.000000 | 0.000002 |
| Grlh1            | 1424030_at   | grainyhead-like 1 (Drosophila)                                                   | 4.82 | 0.000003 | 0.000032 |
| Grlh2            | 1427046_at   | grainyhead-like 2 (Drosophila)                                                   | 5.31 | 0.000007 | 0.000057 |
| Grip1            | 1435951_at   | glutamate receptor interacting protein 1                                         | 4.11 | 0.000001 | 0.000014 |
| Gsdmc            | 1419591_at   | gasdermin C                                                                      | 4.41 | 0.001479 | 0.004042 |
| Gsdmc2           | 1454883_at   | gasdermin C2                                                                     | 6.77 | 0.000578 | 0.001837 |
| Gsdmc2 /// Gsdmc | 1430641_at   | gasdermin C2 /// gasdermin C4                                                    | 5.03 | 0.002276 | 0.005823 |
| Gsta4            | 1416368_at   | glutathione S-transferase, alpha 4                                               | 5.68 | 0.000034 | 0.000185 |

|                  |              |                                                                     |      |          |          |
|------------------|--------------|---------------------------------------------------------------------|------|----------|----------|
| Gstt3            | 1423891_at   | glutathione S-transferase, theta 3                                  | 4.03 | 0.000001 | 0.000016 |
| H2-Q2            | 1418734_at   | histocompatibility 2, Q region locus 2                              | 6.87 | 0.000001 | 0.000017 |
| Hnf1b            | 1451687_a_at | HNF1 homeobox B                                                     | 4.10 | 0.000000 | 0.000003 |
| Homer2           | 1424367_a_at | homer homolog 2 (Drosophila)                                        | 4.46 | 0.000015 | 0.000099 |
| Hook1            | 1438018_at   | hook homolog 1 (Drosophila)                                         | 5.74 | 0.000000 | 0.000004 |
| Hoxb13           | 1419576_at   | homeobox B13                                                        | 6.25 | 0.000006 | 0.000049 |
| Hsd11b2          | 1416761_at   | hydroxysteroid 11-beta dehydrogenase 2                              | 4.57 | 0.000501 | 0.001633 |
| Ica1             | 1431644_a_at | islet cell autoantigen 1                                            | 4.31 | 0.000003 | 0.000028 |
| Ido1             | 1420437_at   | indoleamine 2,3-dioxygenase 1                                       | 4.96 | 0.000042 | 0.000220 |
| Igsf5            | 1451407_at   | immunoglobulin superfamily, member 5                                | 6.25 | 0.000005 | 0.000040 |
| Ikzf2            | 1456956_at   | IKAROS family zinc finger 2                                         | 4.22 | 0.000004 | 0.000037 |
| Il17re           | 1426566_s_at | interleukin 17 receptor E                                           | 5.43 | 0.000000 | 0.000006 |
| Il8              | 1421404_at   | interleukin 8                                                       | 7.20 | 0.000129 | 0.000537 |
| Ildr1            | 1423276_at   | immunoglobulin-like domain containing receptor 1                    | 5.67 | 0.000000 | 0.000002 |
| Inadl            | 1418983_at   | InaD-like (Drosophila)                                              | 5.42 | 0.000001 | 0.000011 |
| Irf6             | 1418301_at   | interferon regulatory factor 6                                      | 5.36 | 0.000000 | 0.000005 |
| Irx2             | 1426298_at   | Iroquois related homeobox 2 (Drosophila)                            | 5.60 | 0.000000 | 0.000004 |
| Irx5             | 1421072_at   | Iroquois related homeobox 5 (Drosophila)                            | 5.47 | 0.000000 | 0.000003 |
| Irgb4            | 1427387_a_at | integrin beta 4                                                     | 4.99 | 0.000000 | 0.000007 |
| Irgb6            | 1422983_at   | integrin beta 6                                                     | 5.61 | 0.000000 | 0.000002 |
| Kcne3            | 1418499_a_at | potassium voltage-gated channel, Isk-related subfamily, gene 3      | 5.03 | 0.000808 | 0.002431 |
| Kcnk1            | 1455896_a_at | potassium channel, subfamily K, member 1                            | 5.91 | 0.000046 | 0.000237 |
| Kcnk5            | 1421852_at   | potassium channel, subfamily K, member 5                            | 4.88 | 0.000001 | 0.000010 |
| Kctd1            | 1422293_a_at | potassium channel tetramerisation domain containing 1               | 4.50 | 0.000000 | 0.000006 |
| Kctd14           | 1455451_at   | potassium channel tetramerisation domain containing 14              | 6.85 | 0.000001 | 0.000013 |
| Klf5             | 1451021_a_at | Kruppel-like factor 5                                               | 5.96 | 0.000030 | 0.000168 |
| Klhdc7a          | 1456409_at   | kelch domain containing 7A                                          | 5.15 | 0.000005 | 0.000041 |
| Krt14            | 1460347_at   | keratin 14                                                          | 5.22 | 0.000000 | 0.000008 |
| Krt15            | 1422667_at   | keratin 15                                                          | 4.56 | 0.000043 | 0.000225 |
| KRT17            | 1423227_at   | keratin 17                                                          | 6.60 | 0.000003 | 0.000033 |
| Krt18            | 1448169_at   | keratin 18                                                          | 5.10 | 0.000002 | 0.000024 |
| Krt19            | 1417156_at   | keratin 19                                                          | 4.53 | 0.000028 | 0.000160 |
| Krt23            | 1418213_at   | keratin 23                                                          | 6.23 | 0.000006 | 0.000050 |
| Krt4             | 1438394_x_at | keratin 4                                                           | 5.76 | 0.000032 | 0.000176 |
| Krt4             | 1418735_at   | keratin 4                                                           | 5.64 | 0.000046 | 0.000235 |
| Krt5             | 1424096_at   | keratin 5                                                           | 5.31 | 0.000001 | 0.000010 |
| Krt6a            | 1422784_at   | keratin 6A                                                          | 4.77 | 0.000005 | 0.000043 |
| Krt7             | 1423952_a_at | keratin 7                                                           | 6.24 | 0.000002 | 0.000022 |
| Krt8             | 1423691_x_at | keratin 8                                                           | 4.34 | 0.000004 | 0.000040 |
| Krtcap3          | 1432474_a_at | keratinocyte associated protein 3                                   | 4.94 | 0.000002 | 0.000023 |
| Lad1             | 1418449_at   | ladinin                                                             | 5.34 | 0.000000 | 0.000004 |
| Lama3            | 1427512_a_at | laminin, alpha 3                                                    | 5.88 | 0.000000 | 0.000002 |
| Lama5            | 1427009_at   | laminin, alpha 5                                                    | 4.11 | 0.000005 | 0.000044 |
| Lamb3            | 1417812_a_at | laminin, beta 3                                                     | 5.77 | 0.000001 | 0.000014 |
| Lgals7           | 1422308_a_at | lectin, galactose binding, soluble 7                                | 5.10 | 0.000451 | 0.001496 |
| Lgr4             | 1433891_at   | leucine-rich repeat-containing G protein-coupled receptor 4         | 4.45 | 0.000002 | 0.000023 |
| Lipe             | 1432180_at   | lipase, hormone sensitive                                           | 5.76 | 0.000001 | 0.000010 |
| Liph             | 1457026_at   | lipase, member H                                                    | 5.56 | 0.000003 | 0.000027 |
| Lmo7             | 1455056_at   | LIM domain only 7                                                   | 5.45 | 0.000008 | 0.000058 |
| LOC101056347 /// | 1460616_at   | solute carrier organic anion transporter family member 4C1-like /// | 4.64 | 0.000036 | 0.000192 |
| LOC26            | 1451498_at   | leucine rich repeat containing 26                                   | 6.20 | 0.000071 | 0.000331 |
| Ltf              | 1450009_at   | lactotransferrin                                                    | 5.52 | 0.000011 | 0.000079 |
| Lurap1l          | 1428384_at   | leucine rich adaptor protein 1-like                                 | 4.64 | 0.000000 | 0.000005 |
| Ly6d             | 1416930_at   | lymphocyte antigen 6 complex, locus D                               | 6.29 | 0.000021 | 0.000130 |
| Ly6k             | 1452855_at   | lymphocyte antigen 6 complex, locus K                               | 4.64 | 0.000677 | 0.002096 |
| Lypd8            | 1451441_at   | LY6/PLAUR domain containing 8                                       | 4.25 | 0.044104 | 0.074100 |
| Macc1            | 1457044_at   | metastasis associated in colon cancer 1                             | 6.18 | 0.000000 | 0.000005 |
| Mal              | 1417275_at   | myelin and lymphocyte protein, T cell differentiation protein       | 6.94 | 0.000013 | 0.000086 |
| Mal2             | 1427042_at   | mal, T cell differentiation protein 2                               | 6.85 | 0.000002 | 0.000021 |
| Mall             | 1435693_at   | mal, T cell differentiation protein-like                            | 4.15 | 0.000249 | 0.000913 |
| Mansc1           | 1423284_at   | MANSC domain containing 1                                           | 4.65 | 0.000002 | 0.000019 |
| Map2             | 1434194_at   | microtubule-associated protein 2                                    | 5.22 | 0.000000 | 0.000004 |
| Map7             | 1421835_at   | microtubule-associated protein 7                                    | 5.05 | 0.000000 | 0.000004 |
| Mapk13           | 1448871_at   | mitogen-activated protein kinase 13                                 | 5.45 | 0.000013 | 0.000089 |
| Marvel2          | 1426914_at   | MARVEL (membrane-associating) domain containing 2                   | 6.01 | 0.000000 | 0.000008 |
| Marvel3          | 1453264_at   | MARVEL (membrane-associating) domain containing 3                   | 6.89 | 0.000000 | 0.000007 |
| Mboat1           | 1435323_a_at | membrane bound O-acyltransferase domain containing 1                | 5.26 | 0.000001 | 0.000012 |
| Me1              | 1416632_at   | malic enzyme 1, NADP(+)-dependent, cytosolic                        | 4.18 | 0.000004 | 0.000039 |
| Mecom            | 1438325_at   | MDS1 and EVI1 complex locus                                         | 4.55 | 0.000001 | 0.000016 |
| Met              | 1434447_at   | met proto-oncogene                                                  | 5.06 | 0.000000 | 0.000002 |
| Mfap3l           | 1428804_at   | microfibrillar-associated protein 3-like                            | 4.09 | 0.000001 | 0.000009 |
| Mfsd4            | 1436021_at   | major facilitator superfamily domain containing 4                   | 6.59 | 0.000002 | 0.000026 |
| Mgst3            | 1448300_at   | microsomal glutathione S-transferase 3                              | 4.02 | 0.000001 | 0.000009 |
| Mia              | 1419608_a_at | melanoma inhibitory activity                                        | 5.86 | 0.000004 | 0.000035 |
| Mlph             | 1449896_at   | melanophilin                                                        | 5.83 | 0.000012 | 0.000084 |
| Mmp15            | 1422597_at   | matrix metalloproteinase 15                                         | 6.84 | 0.000005 | 0.000046 |

|          |              |                                                                              |      |          |          |
|----------|--------------|------------------------------------------------------------------------------|------|----------|----------|
| Mpped2   | 1431751_a_at | metallophosphoesterase domain containing 2                                   | 5.52 | 0.000000 | 0.000006 |
| Mpzl2    | 1448265_x_at | myelin protein zero-like 2                                                   | 5.16 | 0.000002 | 0.000018 |
| Msln     | 1460238_at   | mesothelin                                                                   | 4.44 | 0.000011 | 0.000079 |
| Msx2     | 1449559_at   | homeobox, msh-like 2                                                         | 4.61 | 0.000000 | 0.000002 |
| Muc1     | 1449199_at   | mucin 1, transmembrane                                                       | 5.68 | 0.000030 | 0.000167 |
| Muc20    | 1451786_at   | mucin 20                                                                     | 5.56 | 0.000024 | 0.000140 |
| Myb      | 1422734_a_at | myeloblastosis oncogene                                                      | 5.33 | 0.000000 | 0.000007 |
| Myh14    | 1428835_at   | myosin, heavy polypeptide 14                                                 | 4.10 | 0.000001 | 0.000010 |
| MYO5B    | 1452298_a_at | myosin VB                                                                    | 6.63 | 0.000001 | 0.000012 |
| Myo5c    | 1424933_at   | myosin VC                                                                    | 5.09 | 0.000002 | 0.000025 |
| Myo6     | 1433942_at   | myosin VI                                                                    | 4.85 | 0.000009 | 0.000064 |
| Nbea     | 1452251_at   | neurobeachin                                                                 | 4.13 | 0.000002 | 0.000019 |
| Nfe2l3   | 1417520_at   | nuclear factor, erythroid derived 2, like 3                                  | 7.18 | 0.000000 | 0.000003 |
| Nfib     | 1438244_at   | nuclear factor I/B                                                           | 4.17 | 0.000000 | 0.000005 |
| Nipal2   | 1424612_at   | NIPA-like domain containing 2                                                | 5.37 | 0.000001 | 0.000012 |
| NLRP10   | 1456211_at   | NLR family, pyrin domain containing 10                                       | 6.59 | 0.000039 | 0.000205 |
| Noxo1    | 1425151_a_at | NADPH oxidase organizer 1                                                    | 6.12 | 0.000003 | 0.000027 |
| Nr3c2    | 1435991_at   | nuclear receptor subfamily 3, group C, member 2                              | 4.03 | 0.000014 | 0.000096 |
| Ntf5     | 1440353_at   | neurotrophin 5                                                               | 4.02 | 0.000000 | 0.000007 |
| Ocln     | 1448873_at   | occludin                                                                     | 6.26 | 0.000001 | 0.000014 |
| Oit1     | 1424502_at   | oncoprotein induced transcript 1                                             | 6.06 | 0.000004 | 0.000037 |
| Olfm4    | 1437060_at   | olfactomedin 4                                                               | 5.69 | 0.000003 | 0.000032 |
| Padf4    | 1422760_at   | peptidyl arginine deiminase, type IV                                         | 4.30 | 0.000010 | 0.000075 |
| Pard6b   | 1423174_a_at | par-6 (partitioning defective 6) homolog beta (C. elegans)                   | 6.06 | 0.000027 | 0.000153 |
| Pdzk1ip1 | 1417689_a_at | PDZK1 interacting protein 1                                                  | 4.89 | 0.000037 | 0.000199 |
| Perp     | 1416271_at   | PERP, TP53 apoptosis effector                                                | 4.87 | 0.000000 | 0.000004 |
| Pglyrp1  | 1449184_at   | peptidoglycan recognition protein 1                                          | 5.16 | 0.000731 | 0.002235 |
| Phgdh    | 1454714_x_at | 3-phosphoglycerate dehydrogenase                                             | 4.27 | 0.000013 | 0.000090 |
| Phgdh    | 1437621_x_at | 3-phosphoglycerate dehydrogenase                                             | 4.01 | 0.000004 | 0.000040 |
| Pik3r3   | 1456482_at   | phosphatidylinositol 3 kinase, regulatory subunit, polypeptide 3 (p55)       | 4.96 | 0.000004 | 0.000034 |
| Pkp1     | 1449586_at   | plakophilin 1                                                                | 4.56 | 0.000006 | 0.000048 |
| Pkp2     | 1449799_s_at | plakophilin 2                                                                | 5.48 | 0.000004 | 0.000036 |
| Pkp4     | 1438677_at   | plakophilin 4                                                                | 4.02 | 0.000000 | 0.000002 |
| Plcd3    | 1431892_a_at | phospholipase C, delta 3                                                     | 4.46 | 0.000003 | 0.000029 |
| PLCH1    | 1457157_at   | phospholipase C, eta 1                                                       | 6.60 | 0.000000 | 0.000006 |
| Plek2    | 1449424_at   | pleckstrin 2                                                                 | 4.25 | 0.000000 | 0.000003 |
| Plekha6  | 1427149_at   | pleckstrin homology domain containing, family A member 6                     | 4.26 | 0.000004 | 0.000036 |
| Plekhh1  | 1452517_at   | pleckstrin homology domain containing, family H (with MYTH4 domain) member 1 | 5.27 | 0.000122 | 0.000513 |
| Plekhs1  | 1427521_a_at | pleckstrin homology domain containing, family S member 1                     | 5.90 | 0.000000 | 0.000007 |
| Pls1     | 1460406_at   | plastin 1 (I-isoform)                                                        | 4.22 | 0.000002 | 0.000021 |
| Plxnb1   | 1435254_at   | plexin B1                                                                    | 4.33 | 0.000001 | 0.000014 |
| Pm20d2   | 1457883_at   | peptidase M20 domain containing 2                                            | 4.83 | 0.000004 | 0.000034 |
| Pof1b    | 1427492_at   | premature ovarian failure 1B                                                 | 6.05 | 0.000001 | 0.000014 |
| Ppargc1a | 1460336_at   | peroxisome proliferative activated receptor, gamma, coactivator 1 alpha      | 7.14 | 0.000000 | 0.000003 |
| Ppm1l    | 1435787_at   | protein phosphatase 1 (formerly 2C)-like                                     | 4.03 | 0.000002 | 0.000026 |
| Ppp1r1b  | 1451331_at   | protein phosphatase 1, regulatory (inhibitor) subunit 1B                     | 5.20 | 0.000003 | 0.000028 |
| Ppkaa2   | 1434766_at   | protein kinase, AMP-activated, alpha 2 catalytic subunit                     | 4.44 | 0.000000 | 0.000003 |
| Prlr     | 1441102_at   | prolactin receptor                                                           | 6.89 | 0.000043 | 0.000223 |
| Prom1    | 1419700_a_at | prominin 1                                                                   | 4.21 | 0.000037 | 0.000198 |
| Proser2  | 1456210_at   | proline and serine rich 2                                                    | 5.55 | 0.000000 | 0.000008 |
| Prr15    | 1452473_at   | proline rich 15                                                              | 4.41 | 0.000000 | 0.000004 |
| Prr15l   | 1433870_at   | proline rich 15-like                                                         | 5.68 | 0.000002 | 0.000022 |
| Prss22   | 1420352_at   | protease, serine, 22                                                         | 5.56 | 0.000003 | 0.000028 |
| Prss27   | 1440686_at   | protease, serine, 27                                                         | 6.47 | 0.000153 | 0.000612 |
| Prss8    | 1418320_at   | protease, serine, 8 (prostasin)                                              | 6.14 | 0.000020 | 0.000125 |
| Psap1    | 1440186_s_at | prosaposin-like 1                                                            | 4.99 | 0.000010 | 0.000070 |
| Ptprf    | 1420842_at   | protein tyrosine phosphatase, receptor type, F                               | 4.23 | 0.000001 | 0.000011 |
| Ptprk    | 1444763_at   | protein tyrosine phosphatase, receptor type, K                               | 4.66 | 0.000003 | 0.000029 |
| Rab17    | 1422178_a_at | RAB17, member RAS oncogene family                                            | 4.18 | 0.000012 | 0.000084 |
| Rab25    | 1417738_at   | RAB25, member RAS oncogene family                                            | 5.02 | 0.000001 | 0.000014 |
| Rab27b   | 1439610_at   | RAB27b, member RAS oncogene family                                           | 6.01 | 0.000005 | 0.000044 |
| Rab4a    | 1418341_at   | RAB4A, member RAS oncogene family                                            | 4.55 | 0.000001 | 0.000014 |
| Rad51b   | 1421430_at   | RAD51 homolog B                                                              | 4.16 | 0.000078 | 0.000358 |
| Rasd1    | 1423619_at   | RAS, dexamethasone-induced 1                                                 | 5.20 | 0.000003 | 0.000031 |
| Rasef    | 1458591_at   | RAS and EF hand domain containing                                            | 6.17 | 0.000001 | 0.000011 |
| Rassf6   | 1429262_at   | Ras association (RalGDS/AF-6) domain family member 6                         | 5.85 | 0.000003 | 0.000029 |
| Rassf9   | 1427942_at   | Ras association (RalGDS/AF-6) domain family (N-terminal) member 9            | 4.60 | 0.000001 | 0.000015 |
| Reep6    | 1430128_a_at | receptor accessory protein 6                                                 | 4.80 | 0.000001 | 0.000009 |
| Reg3b    | 1448290_at   | regenerating islet-derived 3 beta                                            | 5.54 | 0.001157 | 0.003282 |
| Reg3g    | 1448872_at   | regenerating islet-derived 3 gamma                                           | 4.60 | 0.000264 | 0.000957 |
| Rhbd12   | 1442819_at   | rhomboid, veinlet-like 2 (Drosophila)                                        | 4.61 | 0.000001 | 0.000011 |
| Rhpn2    | 1431805_a_at | rhophilin, Rho GTPase binding protein 2                                      | 7.01 | 0.000009 | 0.000069 |
| Ripk4    | 1418488_s_at | receptor-interacting serine-threonine kinase 4                               | 6.10 | 0.000000 | 0.000007 |
| Ripply3  | 1420459_at   | rippy3 homolog (zebrafish)                                                   | 4.64 | 0.000013 | 0.000088 |
| Rnf128   | 1449036_at   | ring finger protein 128                                                      | 4.62 | 0.000003 | 0.000032 |
| Rnf43    | 1427008_at   | ring finger protein 43                                                       | 5.84 | 0.000006 | 0.000049 |

|                     |              |                                                                                |      |          |          |
|---------------------|--------------|--------------------------------------------------------------------------------|------|----------|----------|
| S100a14             | 1449166_at   | S100 calcium binding protein A14                                               | 5.76 | 0.000014 | 0.000094 |
| Saa1                | 1450788_at   | serum amyloid A 1                                                              | 5.93 | 0.000557 | 0.001784 |
| Sbp /// Sbp1        | 1418307_a_at | spermine binding protein /// spermine binding protein-like                     | 6.06 | 0.195019 | 0.263602 |
| Sdcbp2              | 1424090_at   | syndecan binding protein (syntenin) 2                                          | 4.89 | 0.000004 | 0.000039 |
| Sectm1a             | 1425002_at   | secreted and transmembrane 1A                                                  | 5.08 | 0.000013 | 0.000088 |
| Sectm1b             | 1419478_at   | secreted and transmembrane 1B                                                  | 5.96 | 0.000003 | 0.000028 |
| Sel1l3              | 1452227_at   | sel-1 suppressor of lin-12-like 3 (C. elegans)                                 | 4.87 | 0.000002 | 0.000024 |
| Serinc2             | 1434382_at   | serine incorporator 2                                                          | 4.68 | 0.000001 | 0.000018 |
| Serpinb11           | 1449451_at   | serine (or cysteine) peptidase inhibitor, clade B (ovalbumin), member 11       | 5.78 | 0.001182 | 0.003345 |
| Serpinb5            | 1441941_x_at | serine (or cysteine) peptidase inhibitor, clade B, member 5                    | 6.28 | 0.000001 | 0.000011 |
| Sfn                 | 1448612_at   | stratifin                                                                      | 4.77 | 0.000008 | 0.000064 |
| Sftpd               | 1420378_at   | surfactant associated protein D                                                | 6.97 | 0.000001 | 0.000015 |
| Sh2d4a              | 1453377_at   | SH2 domain containing 4A                                                       | 4.78 | 0.000000 | 0.000002 |
| Sh3yl1              | 1449579_at   | Sh3 domain YSC-like 1                                                          | 5.28 | 0.000001 | 0.000016 |
| Shmt1               | 1425179_at   | serine hydroxymethyltransferase 1 (soluble)                                    | 4.19 | 0.000002 | 0.000019 |
| Sidt1               | 1426550_at   | SID1 transmembrane family, member 1                                            | 4.43 | 0.000001 | 0.000010 |
| Slain1              | 1424824_at   | SLAIN motif family, member 1                                                   | 4.73 | 0.000001 | 0.000010 |
| Slc12a2             | 1448780_at   | solute carrier family 12, member 2                                             | 4.80 | 0.000002 | 0.000025 |
| Slc15a2             | 1447808_s_at | solute carrier family 15 (H+/peptide transporter), member 2                    | 4.85 | 0.000001 | 0.000012 |
| Slc16a12            | 1434188_at   | solute carrier family 16 (monocarboxylic acid transporters), member 12         | 4.03 | 0.000473 | 0.001557 |
| Slc22a23            | 1453004_at   | solute carrier family 22, member 23                                            | 4.32 | 0.000016 | 0.000104 |
| Slc26a4             | 1419725_at   | solute carrier family 26, member 4                                             | 4.74 | 0.001535 | 0.004177 |
| Slc28a3             | 1419571_at   | solute carrier family 28 (sodium-coupled nucleoside transporter), member 3     | 5.98 | 0.000009 | 0.000065 |
| Slc2a12             | 1435911_s_at | solute carrier family 2 (facilitated glucose transporter), member 12           | 4.32 | 0.000000 | 0.000003 |
| Slc34a2             | 1416854_at   | solute carrier family 34 (sodium phosphate), member 2                          | 5.62 | 0.000001 | 0.000018 |
| Slc35g1             | 1435452_at   | solute carrier family 35, member G1                                            | 4.40 | 0.000003 | 0.000029 |
| Slc39a4             | 1451139_at   | solute carrier family 39 (zinc transporter), member 4                          | 5.78 | 0.000099 | 0.000430 |
| Slc39a8             | 1448482_at   | solute carrier family 39 (metal ion transporter), member 8                     | 5.05 | 0.000167 | 0.000657 |
| Slc44a3             | 1425109_at   | solute carrier family 44, member 3                                             | 6.98 | 0.000034 | 0.000186 |
| Slc44a4             | 1416596_at   | solute carrier family 44, member 4                                             | 4.08 | 0.000021 | 0.000126 |
| Slc45a3             | 1426663_s_at | solute carrier family 45, member 3                                             | 6.58 | 0.000007 | 0.000053 |
| Slc4a4              | 1421225_a_at | solute carrier family 4 (anion exchanger), member 4                            | 4.07 | 0.000001 | 0.000016 |
| Slc5a1              | 1455431_at   | solute carrier family 5 (sodium/glucose cotransporter), member 1               | 6.61 | 0.000002 | 0.000018 |
| Slc5a8              | 1425606_at   | solute carrier family 5 (iodide transporter), member 8                         | 5.89 | 0.000161 | 0.000641 |
| Slc5a9              | 1439494_at   | solute carrier family 5 (sodium/glucose cotransporter), member 9               | 6.69 | 0.000000 | 0.000004 |
| Slc6a14             | 1420504_at   | solute carrier family 6 (neurotransmitter transporter), member 14              | 6.31 | 0.000002 | 0.000021 |
| Slc7a4              | 1426069_s_at | solute carrier family 7 (cationic amino acid transporter, y+ system), member 4 | 5.32 | 0.000006 | 0.000048 |
| Slco1a5             | 1449203_at   | solute carrier organic anion transporter family, member 1a5                    | 7.83 | 0.000001 | 0.000016 |
| Slco1a6             | 1419496_at   | solute carrier organic anion transporter family, member 1a6                    | 5.73 | 0.000000 | 0.000007 |
| Slco4c1             | 1437870_at   | solute carrier organic anion transporter family, member 4C1                    | 4.82 | 0.000028 | 0.000159 |
| Sorbs2              | 1441624_at   | sorbin and SH3 domain containing 2                                             | 4.57 | 0.000002 | 0.000024 |
| Sowahb              | 1438408_at   | sosondawah ankyrin repeat domain family member B                               | 4.87 | 0.000037 | 0.000197 |
| Sox2                | 1416967_at   | SRY-box containing gene 2                                                      | 6.27 | 0.000000 | 0.000001 |
| Sox9                | 1424950_at   | SRY-box containing gene 9                                                      | 5.95 | 0.000000 | 0.000003 |
| Sp8                 | 1440519_at   | trans-acting transcription factor 8                                            | 6.35 | 0.000000 | 0.000002 |
| Spink5              | 1430567_at   | serine peptidase inhibitor, Kazal type 5                                       | 6.86 | 0.000007 | 0.000053 |
| Spint2              | 1451935_a_at | serine protease inhibitor, Kunitz type 2                                       | 4.91 | 0.000008 | 0.000061 |
| Spns2               | 1451601_a_at | spinster homolog 2                                                             | 4.49 | 0.000002 | 0.000026 |
| Sprr1a              | 1449133_at   | small proline-rich protein 1A                                                  | 6.66 | 0.000006 | 0.000052 |
| Sprr2a1 /// Sprr2a: | 1437258_at   | small proline-rich protein 2A1 /// small proline-rich protein 2A2              | 6.22 | 0.000783 | 0.002367 |
| Sprtc3              | 1439492_at   | serine palmitoyltransferase, long chain base subunit 3                         | 4.59 | 0.000053 | 0.000262 |
| Sptsb               | 1417803_at   | serine palmitoyltransferase, small subunit B                                   | 5.33 | 0.000118 | 0.000498 |
| Srd5a1              | 1454649_at   | steroid 5 alpha-reductase 1                                                    | 5.20 | 0.000146 | 0.000590 |
| ST14                | 1418076_at   | suppression of tumorigenicity 14 (colon carcinoma)                             | 6.44 | 0.000000 | 0.000004 |
| Stap2               | 1424148_a_at | signal transducing adaptor family member 2                                     | 5.95 | 0.000001 | 0.000017 |
| Strbp               | 1426411_a_at | spermatid perinuclear RNA binding protein                                      | 4.39 | 0.000000 | 0.000003 |
| Stx19               | 1425290_at   | syntaxin 19                                                                    | 4.70 | 0.000000 | 0.000002 |
| Sult1c2             | 1449409_at   | sulfotransferase family, cytosolic, 1C, member 2                               | 6.08 | 0.002308 | 0.005888 |
| Tacstd2             | 1423323_at   | tumor-associated calcium signal transducer 2                                   | 5.82 | 0.000011 | 0.000080 |
| Tbx3                | 1437479_x_at | T-box 3                                                                        | 4.19 | 0.000002 | 0.000025 |
| Tc2n                | 1443933_at   | tandem C2 domains, nuclear                                                     | 8.04 | 0.000035 | 0.000190 |
| Tenm4               | 1451888_a_at | teneurin transmembrane protein 4                                               | 4.02 | 0.000000 | 0.000005 |
| Tfap2c              | 1436392_s_at | transcription factor AP-2, gamma                                               | 5.04 | 0.000002 | 0.000018 |
| Tfcp2l1             | 1418091_at   | transcription factor CP2-like 1                                                | 5.54 | 0.000013 | 0.000087 |
| Tff3                | 1417370_at   | trefoil factor 3, intestinal                                                   | 6.97 | 0.022487 | 0.041663 |
| Tgfa                | 1421943_at   | transforming growth factor alpha                                               | 4.68 | 0.000000 | 0.000005 |
| Timp4               | 1423405_at   | tissue inhibitor of metalloproteinase 4                                        | 5.40 | 0.000227 | 0.000847 |
| Tjp3                | 1417896_at   | tight junction protein 3                                                       | 6.92 | 0.000004 | 0.000037 |
| Tmc4                | 1427178_at   | transmembrane channel-like gene family 4                                       | 5.61 | 0.000002 | 0.000019 |
| Tmc7                | 1456981_at   | transmembrane channel-like gene family 7                                       | 4.99 | 0.000002 | 0.000020 |
| Tmem184a            | 1424477_at   | transmembrane protein 184a                                                     | 5.02 | 0.000000 | 0.000005 |
| Tmem30b             | 1433579_at   | transmembrane protein 30B                                                      | 4.83 | 0.000001 | 0.000018 |
| Tmem40              | 1441917_s_at | transmembrane protein 40                                                       | 5.50 | 0.000002 | 0.000019 |
| Tmem45b             | 1424357_at   | transmembrane protein 45b                                                      | 7.29 | 0.000231 | 0.000859 |
| Tmem54              | 1417895_a_at | transmembrane protein 54                                                       | 4.01 | 0.000005 | 0.000040 |
| Tmem56              | 1434553_at   | transmembrane protein 56                                                       | 4.45 | 0.000298 | 0.001056 |

|          |              |                                                       |      |          |          |
|----------|--------------|-------------------------------------------------------|------|----------|----------|
| Tmprss13 | 1427477_at   | transmembrane protease, serine 13                     | 5.91 | 0.000073 | 0.000340 |
| Tmprss2  | 1449369_at   | transmembrane protease, serine 2                      | 5.73 | 0.000087 | 0.000391 |
| Tmprss4  | 1426302_at   | transmembrane protease, serine 4                      | 5.95 | 0.000001 | 0.000010 |
| Tnfsf10  | 1459913_at   | tumor necrosis factor (ligand) superfamily, member 10 | 4.03 | 0.000000 | 0.000003 |
| Tnk1     | 1422721_at   | tyrosine kinase, non-receptor, 1                      | 4.79 | 0.000002 | 0.000020 |
| Tnnt2    | 1418726_a_at | troponin T2, cardiac                                  | 4.71 | 0.000007 | 0.000058 |
| Tom111   | 1451117_a_at | target of myb1-like 1 (chicken)                       | 4.84 | 0.000004 | 0.000035 |
| Tox3     | 1436600_at   | TOX high mobility group box family member 3           | 5.44 | 0.000016 | 0.000102 |
| Tpd52l1  | 1418412_at   | tumor protein D52-like 1                              | 4.34 | 0.000007 | 0.000053 |
| Tpm1     | 1456623_at   | tropomyosin 1, alpha                                  | 4.53 | 0.000002 | 0.000020 |
| Trim2    | 1417027_at   | tripartite motif-containing 2                         | 4.33 | 0.000001 | 0.000009 |
| Trp63    | 1418158_at   | transformation related protein 63                     | 5.04 | 0.000000 | 0.000007 |
| Tspan1   | 1417957_a_at | tetraspanin 1                                         | 5.67 | 0.000062 | 0.000297 |
| Tspan1   | 1417958_at   | tetraspanin 1                                         | 5.38 | 0.000001 | 0.000011 |
| Tspan8   | 1420018_s_at | tetraspanin 8                                         | 8.15 | 0.000038 | 0.000202 |
| Ttc39a   | 1455162_at   | tetratricopeptide repeat domain 39A                   | 4.43 | 0.000001 | 0.000012 |
| Tyro3    | 1425248_a_at | TYRO3 protein tyrosine kinase 3                       | 5.52 | 0.000002 | 0.000025 |
| Ubd      | 1419762_at   | ubiquitin D                                           | 6.30 | 0.000006 | 0.000050 |
| Ugt2b34  | 1427960_at   | UDP glucuronosyltransferase 2 family, polypeptide B34 | 6.17 | 0.000135 | 0.000555 |
| Upk1b    | 1435831_at   | uroplakin 1B                                          | 6.17 | 0.000040 | 0.000212 |
| Vnn1     | 1418486_at   | vanin 1                                               | 5.26 | 0.000004 | 0.000039 |
| Vsn1     | 1420955_at   | visinin-like 1                                        | 4.47 | 0.000001 | 0.000014 |
| VTCN1    | 1458070_at   | V-set domain containing T cell activation inhibitor 1 | 6.68 | 0.000002 | 0.000025 |
| W91776   | 1442439_at   | expressed sequence W91776                             | 5.22 | 0.000006 | 0.000048 |
| Wfdc18   | 1417160_s_at | WAP four-disulfide core domain 18                     | 4.00 | 0.000018 | 0.000114 |
| Wfdc2    | 1424351_at   | WAP four-disulfide core domain 2                      | 4.03 | 0.001061 | 0.003050 |
| Wnk2     | 1453355_at   | WNK lysine deficient protein kinase 2                 | 4.86 | 0.000000 | 0.000003 |
| Wnk4     | 1427196_at   | WNK lysine deficient protein kinase 4                 | 4.32 | 0.000000 | 0.000005 |
| Wwc1     | 1427261_at   | WW, C2 and coiled-coil domain containing 1            | 6.33 | 0.000001 | 0.000011 |
| Zfp185   | 1420944_at   | zinc finger protein 185                               | 4.25 | 0.000088 | 0.000392 |
| Zfp612   | 1427104_at   | zinc finger protein 612                               | 5.34 | 0.000000 | 0.000004 |
| Zfp7     | 1451323_at   | zinc finger protein 7                                 | 4.89 | 0.000000 | 0.000003 |
