# Supplementary material
Source: PubMed Central journal article supplement (PMC4707102)
Supplement: NIHMS733225-supplement-6.pdf [file NIHMS733225-supplement-6.pdf]

## Supplementary Table S5

| Symbol     | Probe ID     | Description                                            |
|------------|--------------|--------------------------------------------------------|
| ---        | 1441971_at   |                                                        |
| ---        | 1442936_at   |                                                        |
| 2610528A11 | 1435639_at   | RIKEN cDNA 2610528A11 gene                             |
| Bcl2l15    | 1452614_at   | BCL2-like 15                                           |
| Bnc1       | 1424890_at   | basonuclin 1                                           |
| Calcbr     | 1422639_at   | calcitonin-related polypeptide, beta                   |
| Car12      | 1428485_at   | carbonic anhydrase 12                                  |
| Ccl20      | 1422029_at   | chemokine (C-C motif) ligand 20                        |
| Clca1      | 1460259_s_at | chloride channel calcium activated 1                   |
| Clca2      | 1419463_at   | chloride channel calcium activated 2                   |
| Crabp1     | 1448326_a_at | cellular retinoic acid binding protein I               |
| CstA       | 1435760_at   | cystatin A                                             |
| Cxcl5      | 1419728_at   | chemokine (C-X-C motif) ligand 5                       |
| Dsc3       | 1434534_at   | desmocollin 3                                          |
| Dst        | 1421117_at   | dystonin                                               |
| Fgf13      | 1418497_at   | fibroblast growth factor 13                            |
| Gjb2       | 1423271_at   | gap junction protein, beta 2                           |
| Gpx2       | 1449279_at   | glutathione peroxidase 2                               |
| Krt14      | 1423935_x_at | keratin 14                                             |
| Krt17      | 1423227_at   | keratin 17                                             |
| Krt5       | 1424096_at   | keratin 5                                              |
| Krt6a      | 1422784_at   | keratin 6A                                             |
| Lgals7     | 1422308_a_at | lectin, galactose binding, soluble 7                   |
| Ltf        | 1450009_at   | lactotransferrin                                       |
| Sftpd      | 1420378_at   | surfactant associated protein D                        |
| Slc5a8     | 1425606_at   | solute carrier family 5 (iodide transporter), member 8 |
| Stfa3      | 1435761_at   | stefin A3                                              |
| Ubd        | 1419762_at   | ubiquitin D                                            |
