# Supplementary material
Source: PubMed Central journal article supplement (PMC4707102)
Supplement: NIHMS733225-supplement-7.pdf [file NIHMS733225-supplement-7.pdf]

**Supplementary Table S6**

| Samples | Age | Tumor grade in core (low or high) | Subcellular localization | Yap1 Intensity of signal (0 to 2) |
|---------|-----|-----------------------------------|--------------------------|-----------------------------------|
| a1      | 76  | high                              | Nuclear                  | 0                                 |
| a8      | 75  | low                               | Nuclear                  | 0                                 |
| a15     | 63  | low                               | Nuclear                  | 1                                 |
| b3      | 55  | low                               | Nuclear                  | 0                                 |
| b8      | 66  | low                               | Nuclear                  | 1                                 |
| b13     | 60  | low                               | Nuclear                  | 0                                 |
| b15     | 54  | high                              | Nuclear                  | 2                                 |
| c5      | 80  | high                              | Nuclear                  | 1                                 |
| c8      | 72  | low                               | Nuclear                  | 1                                 |
| c11     | 72  | high                              | Nuclear                  | 0                                 |
| c13     | 56  | high                              | Nuclear                  | 0                                 |
| d2      | 65  | high                              | Nuclear                  | 1                                 |
| d3      | 69  | low                               | Nuclear                  | 1                                 |
| d5      | 73  | high                              | Nuclear                  | 0                                 |
| d7      | 70  | high                              | Nuclear                  | 1                                 |
| d10     | 69  | high                              | Nuclear                  | 2                                 |
| d12     | 69  | high                              | Nuclear                  | 2                                 |
| d14     | 69  | low                               | Nuclear                  | 2                                 |
| d16     | 39  | high                              | Nuclear                  | 0                                 |
| e4      | 82  | high                              | Nuclear                  | 2                                 |
| e6      | 62  | high                              | Nuclear                  | 1                                 |
| e7      | 64  | high                              | Nuclear                  | 0                                 |
| e11     | 70  | high                              | Nuclear                  | 1                                 |
| e14     | 73  | low                               | Nuclear                  | 2                                 |
| e15     | 83  | high                              | Nuclear                  | 0                                 |
| f1      | 20  | high                              | Nuclear                  | 0                                 |
| f4      | 67  | low                               | Nuclear                  | 1                                 |
| f5      | 68  | high                              | Nuclear                  | 1                                 |
| f9      | 62  | high                              | Nuclear                  | 2                                 |
| f12     | 58  | high                              | Nuclear                  | 2                                 |
| f14     | 56  | high                              | Nuclear                  | 0                                 |
| f15     | 73  | high                              | Nuclear                  | 1                                 |
| g2      | 70  | high                              | Nuclear                  | 0                                 |
| g6      | 63  | high                              | Nuclear                  | 0                                 |
| g7      | 51  | high                              | Nuclear                  | 0                                 |
| g9      | 73  | high                              | Nuclear                  | 1                                 |
| g12     | 80  | high                              | Nuclear                  | 0                                 |
| h2      | 76  | high                              | Nuclear                  | 1                                 |
| h4      | 73  | high                              | Nuclear                  | 2                                 |
| h8      | 82  | high                              | Nuclear                  | 2                                 |
| h9      | 73  | high                              | Nuclear                  | 0                                 |
| h11     | 64  | high                              | Nuclear                  | 2                                 |
| h13     | 70  | high                              | Nuclear                  | 0                                 |
| h15     | 60  | high                              | Nuclear                  | 2                                 |
| i2      | 76  | high                              | Nuclear                  | 1                                 |
| i3      | 72  | high                              | Nuclear                  | 1                                 |
| i5      | 65  | high                              | Nuclear                  | 1                                 |
| i8      | 57  | high                              | Nuclear                  | 1                                 |
| i10     | 73  | high                              | Nuclear                  | 2                                 |
| i12     | 63  | high                              | Nuclear                  | 2                                 |
| i14     | 55  | high                              | Nuclear                  | 0                                 |

|     |    |      |         |   |
|-----|----|------|---------|---|
| i16 | 60 | high | Nuclear | 1 |
| j2  | 82 | high | Nuclear | 1 |
| j3  | 72 | high | Nuclear | 1 |
| j6  | 67 | high | Nuclear | 0 |
| j8  | 87 | high | Nuclear | 0 |
| j10 | 60 | high | Nuclear | 0 |
| j12 | 87 | high | Nuclear | 1 |
| j14 | 72 | high | Nuclear | 2 |
| k1  | 62 | high | Nuclear | 1 |
| k3  | 72 | high | Nuclear | 0 |
| k5  | 70 | high | Nuclear | 0 |
| k8  | 62 | high | Nuclear | 1 |
| k10 | 57 | high | Nuclear | 0 |
| k12 | 70 | high | Nuclear | 1 |
| k14 | 77 | high | Nuclear | 0 |
| k16 | 63 | high | Nuclear | 2 |
| l1  | 71 | high | Nuclear | 0 |
| l4  | 78 | high | Nuclear | 0 |
| l6  | 71 | high | Nuclear | 1 |
