# Supplementary material
Source: PubMed Central journal article supplement (PMC4707102)
Supplement: NIHMS733225-supplement-8.pdf [file NIHMS733225-supplement-8.pdf]

## Supplementary Table S7

| Gene    | From                                               |
|---------|----------------------------------------------------|
| CCR2    | Talmadge, Gabrilovich. Nature Reviews Cancer. 2013 |
| CXCR4   | Talmadge, Gabrilovich. Nature Reviews Cancer. 2013 |
| CXCR2   | Talmadge, Gabrilovich. Nature Reviews Cancer. 2013 |
| ITGAM   | Talmadge, Gabrilovich. Nature Reviews Cancer. 2013 |
| ITGAX   | Talmadge, Gabrilovich. Nature Reviews Cancer. 2013 |
| ANPEP   | Talmadge, Gabrilovich. Nature Reviews Cancer. 2013 |
| CD14    | Talmadge, Gabrilovich. Nature Reviews Cancer. 2013 |
| FUT4    | Talmadge, Gabrilovich. Nature Reviews Cancer. 2013 |
| CD33    | Talmadge, Gabrilovich. Nature Reviews Cancer. 2013 |
| CD34    | Talmadge, Gabrilovich. Nature Reviews Cancer. 2013 |
| CD38    | Talmadge, Gabrilovich. Nature Reviews Cancer. 2013 |
| ENTPD1  | Talmadge, Gabrilovich. Nature Reviews Cancer. 2013 |
| PTPRC   | Talmadge, Gabrilovich. Nature Reviews Cancer. 2013 |
| CEACAM8 | Talmadge, Gabrilovich. Nature Reviews Cancer. 2013 |
| CD80    | Talmadge, Gabrilovich. Nature Reviews Cancer. 2013 |
| CSF1R   | Talmadge, Gabrilovich. Nature Reviews Cancer. 2013 |
| IL4R    | Talmadge, Gabrilovich. Nature Reviews Cancer. 2013 |
| CSF3    | Talmadge, Gabrilovich. Nature Reviews Cancer. 2013 |
| CSF2    | Talmadge, Gabrilovich. Nature Reviews Cancer. 2013 |
| CXCL8   | Talmadge, Gabrilovich. Nature Reviews Cancer. 2013 |
| CCL2    | Talmadge, Gabrilovich. Nature Reviews Cancer. 2013 |
| TNF     | Talmadge, Gabrilovich. Nature Reviews Cancer. 2013 |
| CXCL12  | Talmadge, Gabrilovich. Nature Reviews Cancer. 2013 |
| CSF1R   | Talmadge, Gabrilovich. Nature Reviews Cancer. 2013 |
| S100A8  | Literature mining                                  |
| S100A9  | Literature mining                                  |
| STAT1   | Literature mining                                  |
| STAT3   | Literature mining                                  |
| STAT5A  | Literature mining                                  |
| ARG1    | Literature mining                                  |
| NOS2    | Literature mining                                  |
| CD274   | Literature mining                                  |
| TLR3    | Literature mining                                  |
| TLR4    | Literature mining                                  |
| TGFB1   | Literature mining                                  |
| IL10    | Literature mining                                  |
| FOXP3   | Literature mining                                  |
| IDO1    | Literature mining                                  |
| PDCD1   | Literature mining                                  |
